# Supplementary material
Source: publisher figshare collection journal article supplement (https://karger.figshare.com/articles/dataset/_/24793335)
Supplement: Supplementary file 1 [file 1]

**Supplement file 1** The detailed clinical information table for the GEO data

| **Sample** | **Platform** | **Age** | **Gender** | **Tumor** | **Stage** | **Grade** | **OS** | **OS.time** | **T** | **N** | **M** | **Response** | **BRAF_mutation** | **KRAS_mutation** | **TP53_mutation** | **msi_status** | **datasets** |
| --- | --- | --- | --- | --- | --- | --- | --- | --- | --- | --- | --- | --- | --- | --- | --- | --- | --- |
| GSM2772122 | GPL23985 | 48 | F | Left | II | Moderately | 0 | 87.814 | T4 | N0 |  |  | WT | MT | WT |  | GSE103479 |
| GSM2772123 | GPL23985 | 94 | F | Right | II | Moderately | 1 | 39.616 | T4 | N0 |  |  | MT | WT | WT |  | GSE103479 |
| GSM2772124 | GPL23985 | 47 | F | Left | II | Moderately | 0 | 88.208 | T3 | N0 |  |  | WT | MT | WT |  | GSE103479 |
| GSM2772125 | GPL23985 | 77 | F | Right | III | Moderately | 1 | 21.666 | T3 | N1 |  |  |  |  |  |  | GSE103479 |
| GSM2772126 | GPL23985 | 60 | M | Left | III | Moderately | 0 | 87.682 | T2 | N1 |  |  | WT | WT | MT |  | GSE103479 |
| GSM2772127 | GPL23985 | 68 | F | Right | III | Moderately | 0 | 87.518 | T3 | N1 |  |  | WT | WT | MT |  | GSE103479 |
| GSM2772128 | GPL23985 | 67 | M | Right | III | Moderately | 1 | 19.463 | T4 | N1 |  |  | MT | WT | MT |  | GSE103479 |
| GSM2772129 | GPL23985 | 73 | M | Left | II | Moderately | 1 | 66.871 | T3 | N0 |  |  | WT | MT | WT |  | GSE103479 |
| GSM2772130 | GPL23985 | 80 | F | Right | II | Poorly | 0 | 84.658 | T3 | N0 |  |  | WT | WT | MT |  | GSE103479 |
| GSM2772131 | GPL23985 | 57 | M | Left | II | Moderately | 0 | 86.334 | T3 | N0 |  |  | WT | WT | MT |  | GSE103479 |
| GSM2772132 | GPL23985 | 76 | M | Right | II | Moderately | 0 | 86.827 | T3 | N0 |  |  | MT | WT | WT |  | GSE103479 |
| GSM2772133 | GPL23985 | 84 | F | Left | III | Moderately | 1 | 83.573 | T3 | N1 |  |  | WT | MT | WT |  | GSE103479 |
| GSM2772134 | GPL23985 | 71 | M | Left | II | Moderately | 0 | 84.23 | T3 | N0 | M0 |  | WT | MT | MT |  | GSE103479 |
| GSM2772135 | GPL23985 | 73 | M | Left | II | Moderately | 0 | 50.137 | T3 | N0 |  |  | WT | WT | MT |  | GSE103479 |
| GSM2772136 | GPL23985 | 72 | M | Left | II | Moderately | 0 | 84.953 | T3 | N0 |  |  | WT | WT | WT |  | GSE103479 |
| GSM2772137 | GPL23985 | 61 | F | Right | II | Moderately | 0 | 83.967 | T3 | N0 |  |  |  |  |  |  | GSE103479 |
| GSM2772138 | GPL23985 | 58 | M | Left | II | Moderately | 0 | 82.225 | T3 | N0 |  |  | WT | WT | MT |  | GSE103479 |
| GSM2772139 | GPL23985 | 75 | F | Left | II | Moderately | 1 | 24.69 | T3 | N0 |  |  | WT | WT | MT |  | GSE103479 |
| GSM2772140 | GPL23985 | 80 | M | Left | II | Moderately | 0 | 77.622 | T3 | N0 |  |  | WT | WT | MT |  | GSE103479 |
| GSM2772141 | GPL23985 | 78 | M | Left | III | Moderately | 1 | 18.674 | T3 | N2 |  |  | WT | WT | MT |  | GSE103479 |
| GSM2772142 | GPL23985 | 70 | F | Right | III | Moderately | 1 | 36.395 | T3 | N1 |  |  | WT | WT | WT |  | GSE103479 |
| GSM2772143 | GPL23985 | 48 | M |  | III | Poorly | 1 | 1.808 | T4 | N2 |  |  | WT | WT | WT |  | GSE103479 |
| GSM2772144 | GPL23985 | 52 | F | Left | III | Moderately | 0 | 81.337 | T3 | N2 |  |  | WT | WT | MT |  | GSE103479 |
| GSM2772145 | GPL23985 | 84 | F | Right | III | Poorly | 1 | 34.619 | T4 | N2 |  |  | MT | WT | WT |  | GSE103479 |
| GSM2772146 | GPL23985 | 72.2 | M | Left | III | Moderately | 1 | 7.496 | T4 | N1 |  |  | WT | WT | MT |  | GSE103479 |
| GSM2772147 | GPL23985 | 74.4 | M | Right | III | Moderately | 1 | 7.266 | T4 | N1 |  |  | WT | WT | MT |  | GSE103479 |
| GSM2772148 | GPL23985 | 52.6 | F | Left | III | Well | 0 | 57.074 | T3 | N1 |  |  | WT | MT | WT |  | GSE103479 |
| GSM2772149 | GPL23985 | 65.2 | F | Right | III | Moderately | 1 | 21.436 | T4 | N2 |  |  | WT | MT | MT |  | GSE103479 |
| GSM2772150 | GPL23985 | 73.6 | M | Right | II | Moderately | 0 | 22.323 | T4 | N0 |  |  | MT | WT | MT |  | GSE103479 |
| GSM2772151 | GPL23985 | 77.1 | F | Left | II | Moderately | 0 | 41.622 | T3 | N0 |  |  | WT | WT | MT |  | GSE103479 |
| GSM2772152 | GPL23985 | 63 | F | Right | II | Poorly | 0 | 55.463 | T3 | N0 |  |  | WT | MT | MT |  | GSE103479 |
| GSM2772153 | GPL23985 | 55.5 | M | Left | III | Moderately | 0 | 57.271 | T3 | N1 |  |  |  |  |  |  | GSE103479 |
| GSM2772154 | GPL23985 | 85.7 | M | Left | II | Moderately | 1 | 33.929 | T3 | N0 |  |  | WT | MT | WT |  | GSE103479 |
| GSM2772155 | GPL23985 |  | M | Left | II | Moderately | 1 | 0.23 | T3 | N0 |  |  | WT | WT | MT |  | GSE103479 |
| GSM2772156 | GPL23985 | 87.2 | F | Left | II | Moderately | 0 | 44.647 | T4 | N0 | M0 |  | WT | WT | WT |  | GSE103479 |
| GSM2772157 | GPL23985 | 80.8 | F | Right | II | Poorly | 1 | 12.132 | T3 | N0 |  |  | MT | WT | WT |  | GSE103479 |
| GSM2772158 | GPL23985 | 68.5 | F | Right | II | Well | 0 | 45.304 | T3 | N0 |  |  | WT | MT | WT |  | GSE103479 |
| GSM2772159 | GPL23985 | 81.8 | M | Left | III | Poorly | 0 | 48.329 | T3 | N1 |  |  |  |  |  |  | GSE103479 |
| GSM2772160 | GPL23985 | 71.5 | M | Left | II | Moderately | 0 | 47.737 | T4 | N0 |  |  | WT | WT | MT |  | GSE103479 |
| GSM2772161 | GPL23985 | 86.5 | M | Right | II | Moderately | 1 | 0.362 | T3 | N0 |  |  | WT | WT | WT |  | GSE103479 |
| GSM2772162 | GPL23985 | 65.4 | M | Left | III | Poorly | 0 | 49.479 | T4 | N1 |  |  | WT | MT | WT |  | GSE103479 |
| GSM2772164 | GPL23985 | 78.8 | F | Left | III | Moderately | 0 | 46.422 | T4 | N1 | M0 |  | WT | MT | WT |  | GSE103479 |
| GSM2772165 | GPL23985 | 85.3 | M | Left | III | Moderately | 0 | 6.904 | T4 | N1 | M0 |  | WT | MT | MT |  | GSE103479 |
| GSM2772166 | GPL23985 | 63.8 | F | Right | II | Poorly | 0 | 1.249 | T4 | N0 |  |  |  |  |  |  | GSE103479 |
| GSM2772167 | GPL23985 | 67 | M | Left | III | Poorly | 0 | 48.23 | T4 | N2 |  |  | WT | MT | MT |  | GSE103479 |
| GSM2772168 | GPL23985 | 76.5 | F | Left | III | Poorly | 0 | 48.559 | T4 | N2 |  |  |  |  |  |  | GSE103479 |
| GSM2772169 | GPL23985 | 61 | M | Left | II | Moderately | 0 | 41.622 | T3 | N0 | M0 |  | WT | WT | MT |  | GSE103479 |
| GSM2772170 | GPL23985 |  | F | Right | III | Poorly | 1 | 9.995 | T4 | N2 |  |  | MT | WT | WT |  | GSE103479 |
| GSM2772171 | GPL23985 | 65 | M | Left | III | Poorly | 1 | 12.822 | T4 | N1 |  |  | WT | MT | WT |  | GSE103479 |
| GSM2772172 | GPL23985 | 65.9 | M | Right | III | Poorly | 0 | 44.877 | T4 | N2 | M0 |  |  |  |  |  | GSE103479 |
| GSM2772173 | GPL23985 | 78.4 | F | Right | III | Poorly | 0 | 47.803 | T3 | N1 |  |  | WT | MT | WT |  | GSE103479 |
| GSM2772174 | GPL23985 | 73 | F | Left | II | Poorly | 0 | 43.397 | T4 | N0 |  |  | WT | WT | WT |  | GSE103479 |
| GSM2772175 | GPL23985 | 81.2 | F | Left | II | Moderately | 1 | 10.816 | T3 | N0 |  |  |  |  |  |  | GSE103479 |
| GSM2772176 | GPL23985 | 81.3 | M | Right | III | Poorly | 1 | 5.819 | T4 | N2 | M0 |  | WT | WT | MT |  | GSE103479 |
| GSM2772177 | GPL23985 | 74.9 | M | Left | II | Moderately | 1 | 5.293 | T4 | N0 |  |  |  |  |  |  | GSE103479 |
| GSM2772178 | GPL23985 | 57.1 | M | Left | III | Moderately | 0 | 44.975 | T3 | N1 |  |  | WT | WT | MT |  | GSE103479 |
| GSM2772179 | GPL23985 | 71.5 | M | Right | III | Moderately | 0 | 44.482 | T4 | N1 |  |  | WT | MT | WT |  | GSE103479 |
| GSM2772180 | GPL23985 | 69.1 | F | Left | III | Moderately | 1 | 38.071 | T3 | N1 | M0 |  | WT | WT | WT |  | GSE103479 |
| GSM2772181 | GPL23985 | 62 | M |  | II | Moderately | 1 | 164.384 | T3 | N0 | M0 |  | WT | WT | MT |  | GSE103479 |
| GSM2772182 | GPL23985 | 65.8 | F | Left | II | Moderately | 0 | 102.51 | T3 | N0 | M0 |  | WT | WT | WT |  | GSE103479 |
| GSM2772183 | GPL23985 | 68.4 | M | Left | II | Moderately | 0 | 104.811 | T3 | N0 | M0 |  | WT | WT | WT |  | GSE103479 |
| GSM2772184 | GPL23985 | 74.9 | F | Right | II | Moderately | 1 | 14.334 | T3 | N0 | M0 |  | WT | MT | WT |  | GSE103479 |
| GSM2772185 | GPL23985 | 67.4 | M | Left | II | Moderately | 1 | 0.329 | T3 | N0 | M0 |  | WT | MT | WT |  | GSE103479 |
| GSM2772186 | GPL23985 | 53.9 | F | Left | II | Moderately | 0 | 84.756 | T3 | N0 | M0 |  | WT | WT | MT |  | GSE103479 |
| GSM2772187 | GPL23985 | 62.6 | M | Right | III | Moderately | 1 | 44.877 | T3 | N1 | M0 |  |  |  |  |  | GSE103479 |
| GSM2772188 | GPL23985 | 63.4 | M | Left | II | Moderately | 0 | 79.627 | T3 | N0 | M0 |  | WT | WT | MT |  | GSE103479 |
| GSM2772189 | GPL23985 | 66 | M | Left | III | Moderately | 0 | 79.167 | T3 | N1 | M0 |  | WT | WT | WT |  | GSE103479 |
| GSM2772190 | GPL23985 | 73.5 | M | Right | III | Moderately | 1 | 45.041 | T4 | N1 | M0 |  | WT | WT | WT |  | GSE103479 |
| GSM2772191 | GPL23985 | 84.2 | F | Right | III | Moderately | 1 | 9.6 | T4 | N2 | M0 |  | MT | WT | WT |  | GSE103479 |
| GSM2772192 | GPL23985 | 84.7 | F | Left | III | Moderately | 0 | 70.323 | T3 | N1 | M0 |  | WT | WT | WT |  | GSE103479 |
| GSM2772193 | GPL23985 | 78.3 | M | Right | II | Moderately | 0 | 68.285 | T3 | N0 | M0 |  | WT | WT | WT |  | GSE103479 |
| GSM2772194 | GPL23985 | 42.5 | F | Left | III | Moderately | 0 | 63.616 | T3 | N1 | M0 |  | WT | WT | MT |  | GSE103479 |
| GSM2772195 | GPL23985 | 53.3 | M |  | II | Well | 0 | 64.471 | T3 | N0 | M0 |  | WT | WT | MT |  | GSE103479 |
| GSM2772196 | GPL23985 | 69.6 | F | Left | III | Moderately | 0 | 58.422 | T2 | N2 | M0 |  | WT | WT | MT |  | GSE103479 |
| GSM2772197 | GPL23985 | 84.9 | M | Left | III | Moderately | 1 | 27.682 | T3 | N2 | M0 |  | WT | MT | WT |  | GSE103479 |
| GSM2772198 | GPL23985 | 64.1 | M |  | II | Moderately | 0 | 89.786 | T3 | N0 | M0 |  | WT | MT | WT |  | GSE103479 |
| GSM2772199 | GPL23985 | 75.9 | M | Right | III | Moderately | 0 | 93.896 | T2 | N1 | M0 |  | WT | MT | MT |  | GSE103479 |
| GSM2772200 | GPL23985 | 63 | M | Left | II | Moderately | 1 | 90.773 | T3 | N0 | M0 |  | WT | WT | MT |  | GSE103479 |
| GSM2772201 | GPL23985 | 66.9 | M | Left | III | Moderately | 1 | 37.874 | T3 | N2 | M0 |  | WT | WT | WT |  | GSE103479 |
| GSM2772202 | GPL23985 | 86.6 | F | Right | II | Moderately | 1 | 47.803 | T3 | N0 | M0 |  | WT | WT | WT |  | GSE103479 |
| GSM2772203 | GPL23985 | 85.5 | F |  | II | Well | 0 | 67.66 | T3 | N0 | M0 |  | MT | WT | MT |  | GSE103479 |
| GSM2772204 | GPL23985 | 77.7 | F | Right | III | Poorly | 1 | 7.529 | T4 | N1 | M0 |  | WT | WT | WT |  | GSE103479 |
| GSM2772205 | GPL23985 | 75.5 | M | Left | II | Moderately | 1 | 40.011 | T3 | N0 | M0 |  |  |  |  |  | GSE103479 |
| GSM2772206 | GPL23985 | 78.6 | M | Right | II | Moderately | 0 | 56.811 | T3 | N0 | M0 |  | WT | WT | WT |  | GSE103479 |
| GSM2772207 | GPL23985 | 83.9 | F | Right | III | Moderately | 1 | 41.293 | T2 | N1 | M0 |  | WT | MT | WT |  | GSE103479 |
| GSM2772208 | GPL23985 | 42.8 | F | Left | II |  | 0 | 205.249 | T3 | N0 | M0 |  | WT | MT | MT |  | GSE103479 |
| GSM2772209 | GPL23985 | 62.9 | M | Left | III | Moderately | 1 | 58.356 | T2 | N1 | M0 |  | WT | WT | MT |  | GSE103479 |
| GSM2772210 | GPL23985 | 51.5 | M |  | II | Moderately | 0 | 217.94 | T3 | N0 | M0 |  | WT | WT | MT |  | GSE103479 |
| GSM2772211 | GPL23985 | 36.6 | M |  | II | Moderately | 0 | 214.356 | T3 | N0 | M0 |  | WT | MT | MT |  | GSE103479 |
| GSM2772212 | GPL23985 | 62.7 | F |  | III | Moderately | 0 | 212.121 | T3 | N1 | M0 |  | WT | MT | MT |  | GSE103479 |
| GSM2772213 | GPL23985 | 83.7 | M | Left | II |  | 1 | 59.704 | T3 | N0 | M0 |  | WT | WT | MT |  | GSE103479 |
| GSM2772214 | GPL23985 | 56.4 | F | Right | III |  | 1 | 30.411 | T3 | N1 | M0 |  | WT | MT | MT |  | GSE103479 |
| GSM2772215 | GPL23985 | 67 | M | Left | III | Moderately | 0 | 97.512 | T3 | N2 | M0 |  | WT | WT | MT |  | GSE103479 |
| GSM2772216 | GPL23985 | 83.7 | F | Left | II | Moderately | 1 | 43.266 | T3 | N0 | M0 |  | WT | WT | WT |  | GSE103479 |
| GSM2772217 | GPL23985 | 75.6 | M | Right | III |  | 0 | 98.005 | T3 | N1 | M0 |  | WT | WT | WT |  | GSE103479 |
| GSM2772218 | GPL23985 | 86.1 | F | Right | III | Poorly | 1 | 55.956 | T4 | N1 |  |  | WT | WT | MT |  | GSE103479 |
| GSM2772219 | GPL23985 | 84.6 | M | Left | III | Moderately | 1 | 57.205 | T3 | N1 | M0 |  | WT | WT | MT |  | GSE103479 |
| GSM2772220 | GPL23985 | 76.6 | M | Right | III | Well | 1 | 35.54 | T3 | N1 |  |  | WT | WT | MT |  | GSE103479 |
| GSM2772221 | GPL23985 | 73.3 | M | Right | II | Poorly | 0 | 91.364 | T3 | N0 | M0 |  | WT | MT | MT |  | GSE103479 |
| GSM2772222 | GPL23985 | 71.8 | M | Left | III | Moderately | 1 | 27.978 | T4 | N2 |  |  | MT | WT | MT |  | GSE103479 |
| GSM2772223 | GPL23985 | 80.8 | M | Left | II | Poorly | 1 | 66.444 | T3 | N0 | M0 |  | WT | WT | WT |  | GSE103479 |
| GSM2772224 | GPL23985 | 69 | M | Left | II | Moderately | 0 | 105.271 | T3 | N0 | M0 |  | WT | MT | MT |  | GSE103479 |
| GSM2772225 | GPL23985 | 80.7 | F | Left | III | Poorly | 1 | 55.332 | T3 | N1 |  |  | MT | WT | WT |  | GSE103479 |
| GSM2772226 | GPL23985 | 73.8 | M | Left | III | Moderately | 0 | 88.175 | T3 | N1 | M0 |  | MT | WT | MT |  | GSE103479 |
| GSM2772227 | GPL23985 | 59 | M | Right | II | Moderately | 0 | 90.049 | T3 | N0 | M0 |  | WT | WT | MT |  | GSE103479 |
| GSM2772228 | GPL23985 | 84.6 | F | Left | III | Moderately | 1 | 82.619 | T3 | N1 |  |  | WT | MT | MT |  | GSE103479 |
| GSM2772229 | GPL23985 | 82.7 | M | Right | II | Moderately | 1 | 71.408 | T4 | N0 |  |  | WT | MT | MT |  | GSE103479 |
| GSM2772230 | GPL23985 | 88 | F | Right | II | Moderately | 1 | 58.652 | T3 | N0 |  |  | WT | MT | MT |  | GSE103479 |
| GSM2772231 | GPL23985 | 44.1 | F | Left | II | Moderately | 0 | 95.605 | T3 | N0 | M0 |  | WT | WT | MT |  | GSE103479 |
| GSM2772232 | GPL23985 | 69.6 | M | Left | III | Moderately | 1 | 52.734 | T2 | N1 |  |  | WT | MT | MT |  | GSE103479 |
| GSM2772233 | GPL23985 | 77.5 | F | Left | III | Poorly | 0 | 102.74 | T3 | N2 | M0 |  | WT | MT | MT |  | GSE103479 |
| GSM2772234 | GPL23985 | 57.7 | M | Left | II | Moderately | 0 | 63.912 | T3 | N0 | M0 |  | WT | WT | MT |  | GSE103479 |
| GSM2772235 | GPL23985 | 69.7 | M | Right | III | Moderately | 0 | 97.315 | T4 | N1 | M0 |  | WT | MT | MT |  | GSE103479 |
| GSM2772236 | GPL23985 | 67.6 | F | Right | II | Moderately | 0 | 92.285 | T3 | N0 |  |  | WT | MT | MT |  | GSE103479 |
| GSM2772237 | GPL23985 | 80.2 | F | Right | II | Moderately | 1 | 48.855 | T3 | N0 | M0 |  | WT | WT | MT |  | GSE103479 |
| GSM2772238 | GPL23985 | 69.6 | M | Left | II | Moderately | 0 | 62.86 | T3 | N0 |  |  | WT | WT | WT |  | GSE103479 |
| GSM2772239 | GPL23985 | 72.5 | F | Right | II | Moderately | 0 | 92.449 | T3 | N0 | M0 |  | WT | MT | WT |  | GSE103479 |
| GSM2772240 | GPL23985 | 61.9 | F | Right | II | Moderately | 0 | 99.781 | T3 | N0 | M0 |  | WT | MT | MT |  | GSE103479 |
| GSM2772241 | GPL23985 | 61.8 | M | Left | II | Moderately | 1 | 18.345 | T4 | N0 |  |  | WT | WT | MT |  | GSE103479 |
| GSM2772242 | GPL23985 | 68.7 | M | Left | III | Moderately | 1 | 37.381 | T3 | N2 |  |  | WT | WT | WT |  | GSE103479 |
| GSM2772243 | GPL23985 | 60.1 | M | Right | III | Moderately | 0 | 59.704 | T4 | N1 | M0 |  | WT | MT | MT |  | GSE103479 |
| GSM2772244 | GPL23985 | 73.2 | F | Left | III | Moderately | 0 | 57.501 | T4 | N1 | M0 |  |  |  |  |  | GSE103479 |
| GSM2772245 | GPL23985 | 81.2 | F | Right | II | Moderately | 0 | 57.699 | T3 | N0 | M0 |  | WT | MT | WT |  | GSE103479 |
| GSM2772246 | GPL23985 | 60.7 | M | Left | II | Moderately | 0 | 55.595 | T3 | N0 | M0 |  | WT | MT | WT |  | GSE103479 |
| GSM2772247 | GPL23985 | 75.3 | F | Left | II | Moderately | 0 | 56.679 | T3 | N0 | M0 |  | WT | WT | MT |  | GSE103479 |
| GSM2772248 | GPL23985 | 64.7 | M | Left | II | Moderately | 1 | 41.03 | T3 | N0 | M0 |  | WT | MT | WT |  | GSE103479 |
| GSM2772249 | GPL23985 | 57 | F | Left | III | Moderately | 0 | 52.34 | T3 | N1 | M0 |  | WT | WT | WT |  | GSE103479 |
| GSM2772250 | GPL23985 | 71.1 | M | Left | II | Moderately | 0 | 54.444 | T3 | N0 | M0 |  | WT | MT | WT |  | GSE103479 |
| GSM2772251 | GPL23985 | 66.8 | F | Left | II | Moderately | 0 | 53.162 | T3 | N0 | M0 |  | WT | WT | MT |  | GSE103479 |
| GSM2772252 | GPL23985 | 68.5 | M | Left | II | Moderately | 0 | 53.359 | T3 | N0 | M0 |  | WT | MT | WT |  | GSE103479 |
| GSM2772253 | GPL23985 | 53.2 | M | Left | II | Moderately | 0 | 45.403 | T3 | N0 | M0 |  | WT | MT | MT |  | GSE103479 |
| GSM2772254 | GPL23985 | 78 | M | Left | II | Moderately | 0 | 49.348 | T3 | N0 | M0 |  | WT | WT | MT |  | GSE103479 |
| GSM2772255 | GPL23985 | 72.9 | F | Right | III | Moderately | 1 | 38.827 | T3 | N2 | M0 |  | WT | MT | WT |  | GSE103479 |
| GSM2772256 | GPL23985 | 93 | F | Left | III | Well | 1 | 48.625 | T3 | N1 | M0 |  | WT | MT | MT |  | GSE103479 |
| GSM2772257 | GPL23985 | 70.1 | F |  | II | Moderately | 0 | 43.43 | T3 | N0 | M0 |  | WT | MT | WT |  | GSE103479 |
| GSM2772258 | GPL23985 | 72.7 | M | Left | II | Moderately | 0 | 47.474 | T3 | N0 | M0 |  | WT | WT | MT |  | GSE103479 |
| GSM2772259 | GPL23985 | 62.2 | M | Left | II | Moderately | 0 | 44.548 | T4 | N0 | M0 |  | WT | WT | MT |  | GSE103479 |
| GSM2772260 | GPL23985 | 67.2 | F | Left | III | Moderately | 0 | 49.085 | T4 | N2 | M0 |  | WT | WT | MT |  | GSE103479 |
| GSM2772261 | GPL23985 | 83.8 | M | Right | II | Poorly | 0 | 39.682 | T3 | N0 | M0 |  | MT | WT | WT |  | GSE103479 |
| GSM2772262 | GPL23985 | 58.4 | M | Left | III | Moderately | 0 | 43.397 | T3 | N2 | M0 |  |  |  |  |  | GSE103479 |
| GSM2772263 | GPL23985 | 62.1 | M | Right | III | Poorly | 1 | 20.153 | T3 | N1 | M0 |  | WT | MT | WT |  | GSE103479 |
| GSM2772264 | GPL23985 | 86.8 | M | Right | III | Poorly | 0 | 43.233 | T3 | N1 | M0 |  | WT | MT | MT |  | GSE103479 |
| GSM2772265 | GPL23985 | 59.1 | F | Right | II | Moderately | 0 | 36.953 | T3 | N0 | M0 |  | WT | WT | MT |  | GSE103479 |
| GSM2772266 | GPL23985 | 70.4 | F | Right | III | Poorly | 0 | 37.775 | T3 | N1 | M0 |  | MT | WT | WT |  | GSE103479 |
| GSM2772267 | GPL23985 | 72.6 | M | Right | II | Moderately | 0 | 44.745 | T3 | N0 | M0 |  | WT | WT | WT |  | GSE103479 |
| GSM2772268 | GPL23985 | 60.8 | M | Right | III | Moderately | 0 | 39.156 | T3 | N1 | M0 |  | WT | MT | MT |  | GSE103479 |
| GSM2772269 | GPL23985 | 59.3 | M | Left | II | Poorly | 0 | 35.967 | T3 | N0 | M0 |  |  |  |  |  | GSE103479 |
| GSM2772270 | GPL23985 | 55 | F | Left | III | Poorly | 0 | 92.055 | T3 | N1 |  |  | MT | WT | MT |  | GSE103479 |
| GSM2772271 | GPL23985 | 48 | M | Left | III | Moderately | 0 | 91.595 | T3 | N2 |  |  |  |  |  |  | GSE103479 |
| GSM2772272 | GPL23985 | 81 | M | Right | III | Moderately | 1 | 40.734 | T3 | N1 |  |  | WT | MT | MT |  | GSE103479 |
| GSM2772273 | GPL23985 | 46 | F | Left | III | Moderately | 1 | 24 | T1 | N1 |  |  | WT | MT | MT |  | GSE103479 |
| GSM2772274 | GPL23985 | 52 | M | Right | II | Moderately | 0 | 131.474 | T3 | N0 |  |  |  |  |  |  | GSE103479 |
| GSM2772275 | GPL23985 | 62.4 | F | Left | II | Moderately | 0 | 148.866 | T4 | N0 |  |  |  |  |  |  | GSE103479 |
| GSM2772276 | GPL23985 | 73.8 | F | Right | II | Poorly | 0 | 143.244 | T4 | N0 |  |  |  |  |  |  | GSE103479 |
| GSM2772277 | GPL23985 | 64.1 | F | Left | II | Moderately | 1 | 36.099 | T3 | N0 | M0 |  | WT | MT | MT |  | GSE103479 |
| GSM437093 | GPL570 | 73 | M |  | I | Moderately | 0 | 142.55 |  |  |  |  |  |  |  |  | GSE17536 |
| GSM437094 | GPL570 | 63 | M |  | I | Well | 0 | 122.72 |  |  |  |  |  |  |  |  | GSE17536 |
| GSM437095 | GPL570 | 51 | M |  | I | Moderately | 1 | 28.96 |  |  |  |  |  |  |  |  | GSE17536 |
| GSM437096 | GPL570 | 56 | F |  | I | Well | 0 | 119.21 |  |  |  |  |  |  |  |  | GSE17536 |
| GSM437097 | GPL570 | 50 | M |  | I | Moderately | 0 | 59.53 |  |  |  |  |  |  |  |  | GSE17536 |
| GSM437098 | GPL570 | 63 | F |  | I | Moderately | 1 | 68.81 |  |  |  |  |  |  |  |  | GSE17536 |
| GSM437099 | GPL570 | 66 | M |  | I | Well | 0 | 82.29 |  |  |  |  |  |  |  |  | GSE17536 |
| GSM437100 | GPL570 | 63 | M |  | I | Moderately | 0 | 110.82 |  |  |  |  |  |  |  |  | GSE17536 |
| GSM437101 | GPL570 | 88 | M |  | I | Moderately | 1 | 65.88 |  |  |  |  |  |  |  |  | GSE17536 |
| GSM437102 | GPL570 | 66 | M |  | I | Moderately | 0 | 84.13 |  |  |  |  |  |  |  |  | GSE17536 |
| GSM437103 | GPL570 | 80 | F |  | I | Moderately | 1 | 16.47 |  |  |  |  |  |  |  |  | GSE17536 |
| GSM437104 | GPL570 | 62 | M |  | I | Moderately | 0 | 89.75 |  |  |  |  |  |  |  |  | GSE17536 |
| GSM437105 | GPL570 | 82 | M |  | I | Moderately | 0 | 76.07 |  |  |  |  |  |  |  |  | GSE17536 |
| GSM437106 | GPL570 | 78 | F |  | I | Moderately | 0 | 67.82 |  |  |  |  |  |  |  |  | GSE17536 |
| GSM437107 | GPL570 | 76 | M |  | I | Well | 0 | 52.24 |  |  |  |  |  |  |  |  | GSE17536 |
| GSM437108 | GPL570 | 87 | F |  | I | Moderately | 0 | 64.1 |  |  |  |  |  |  |  |  | GSE17536 |
| GSM437109 | GPL570 | 74 | F |  | I | Moderately | 0 | 55.13 |  |  |  |  |  |  |  |  | GSE17536 |
| GSM437110 | GPL570 | 55 | M |  | I | Moderately | 0 | 57.79 |  |  |  |  |  |  |  |  | GSE17536 |
| GSM437111 | GPL570 | 71 | M |  | I | Moderately | 0 | 50.1 |  |  |  |  |  |  |  |  | GSE17536 |
| GSM437112 | GPL570 | 86 | F |  | I | Moderately | 0 | 43.79 |  |  |  |  |  |  |  |  | GSE17536 |
| GSM437113 | GPL570 | 58 | M |  | I | Moderately | 0 | 30.27 |  |  |  |  |  |  |  |  | GSE17536 |
| GSM437114 | GPL570 | 78 | M |  | I | Moderately | 0 | 3.64 |  |  |  |  |  |  |  |  | GSE17536 |
| GSM437115 | GPL570 | 57 | M |  | I | Well | 0 | 36.59 |  |  |  |  |  |  |  |  | GSE17536 |
| GSM437116 | GPL570 | 81 | M |  | I | Moderately | 0 | 20.02 |  |  |  |  |  |  |  |  | GSE17536 |
| GSM437117 | GPL570 | 74 | F |  | II | Moderately | 0 | 118.58 |  |  |  |  |  |  |  |  | GSE17536 |
| GSM437118 | GPL570 | 77 | F |  | II | Poorly | 0 | 55.33 |  |  |  |  |  |  |  |  | GSE17536 |
| GSM437119 | GPL570 | 41 | M |  | II | Moderately | 1 | 134.86 |  |  |  |  |  |  |  |  | GSE17536 |
| GSM437120 | GPL570 | 43 | F |  | II | Moderately | 0 | 127.29 |  |  |  |  |  |  |  |  | GSE17536 |
| GSM437121 | GPL570 | 51 | F |  | II | Moderately | 0 | 120.62 |  |  |  |  |  |  |  |  | GSE17536 |
| GSM437122 | GPL570 | 70 | M |  | II | Moderately | 0 | 106.94 |  |  |  |  |  |  |  |  | GSE17536 |
| GSM437123 | GPL570 | 78 | F |  | II | Moderately | 1 | 11.7 |  |  |  |  |  |  |  |  | GSE17536 |
| GSM437124 | GPL570 | 80 | M |  | II | Moderately | 1 | 28.79 |  |  |  |  |  |  |  |  | GSE17536 |
| GSM437125 | GPL570 | 66 | M |  | II | Moderately | 1 | 26.82 |  |  |  |  |  |  |  |  | GSE17536 |
| GSM437126 | GPL570 | 76 | F |  | II | Moderately | 1 | 52.5 |  |  |  |  |  |  |  |  | GSE17536 |
| GSM437127 | GPL570 | 58 | F |  | II | Poorly | 1 | 24.03 |  |  |  |  |  |  |  |  | GSE17536 |
| GSM437128 | GPL570 | 74 | M |  | II | Moderately | 0 | 88.99 |  |  |  |  |  |  |  |  | GSE17536 |
| GSM437129 | GPL570 | 49 | M |  | II | Moderately | 0 | 102.44 |  |  |  |  |  |  |  |  | GSE17536 |
| GSM437130 | GPL570 | 54 | F |  | II | Moderately | 1 | 33.73 |  |  |  |  |  |  |  |  | GSE17536 |
| GSM437131 | GPL570 | 71 | F |  | II | Moderately | 0 | 85.28 |  |  |  |  |  |  |  |  | GSE17536 |
| GSM437132 | GPL570 | 79 | F |  | II | Moderately | 0 | 26.53 |  |  |  |  |  |  |  |  | GSE17536 |
| GSM437133 | GPL570 | 75 | F |  | II | Well | 1 | 37.31 |  |  |  |  |  |  |  |  | GSE17536 |
| GSM437134 | GPL570 | 74 | F |  | II | Moderately | 0 | 86.43 |  |  |  |  |  |  |  |  | GSE17536 |
| GSM437135 | GPL570 | 74 | F |  | II | Moderately | 0 | 55.92 |  |  |  |  |  |  |  |  | GSE17536 |
| GSM437136 | GPL570 | 83 | F |  | II | Moderately | 0 | 70.65 |  |  |  |  |  |  |  |  | GSE17536 |
| GSM437137 | GPL570 | 73 | M |  | II | Moderately | 0 | 76.04 |  |  |  |  |  |  |  |  | GSE17536 |
| GSM437138 | GPL570 | 57 | F |  | II | Well | 0 | 79.13 |  |  |  |  |  |  |  |  | GSE17536 |
| GSM437139 | GPL570 | 65 | F |  | II | Moderately | 0 | 83.99 |  |  |  |  |  |  |  |  | GSE17536 |
| GSM437140 | GPL570 | 86 | F |  | II | Moderately | 0 | 80.25 |  |  |  |  |  |  |  |  | GSE17536 |
| GSM437141 | GPL570 | 89 | F |  | II | Well | 0 | 40.6 |  |  |  |  |  |  |  |  | GSE17536 |
| GSM437142 | GPL570 | 56 | F |  | II | Poorly | 0 | 95.37 |  |  |  |  |  |  |  |  | GSE17536 |
| GSM437143 | GPL570 | 86 | F |  | II | Poorly | 1 | 31.06 |  |  |  |  |  |  |  |  | GSE17536 |
| GSM437144 | GPL570 | 71 | M |  | II | Moderately | 1 | 37.31 |  |  |  |  |  |  |  |  | GSE17536 |
| GSM437145 | GPL570 | 78 | F |  | II | Moderately | 1 | 22.02 |  |  |  |  |  |  |  |  | GSE17536 |
| GSM437146 | GPL570 | 76 | M |  | II | Moderately | 0 | 63.25 |  |  |  |  |  |  |  |  | GSE17536 |
| GSM437147 | GPL570 | 66 | F |  | II | Poorly | 0 | 34.09 |  |  |  |  |  |  |  |  | GSE17536 |
| GSM437148 | GPL570 | 65 | F |  | II | Moderately | 0 | 52.14 |  |  |  |  |  |  |  |  | GSE17536 |
| GSM437149 | GPL570 | 74 | F |  | II | Moderately | 0 | 66.04 |  |  |  |  |  |  |  |  | GSE17536 |
| GSM437150 | GPL570 | 67 | M |  | II | Well | 0 | 59.96 |  |  |  |  |  |  |  |  | GSE17536 |
| GSM437151 | GPL570 | 56 | M |  | II | Moderately | 0 | 47.86 |  |  |  |  |  |  |  |  | GSE17536 |
| GSM437152 | GPL570 | 48 | F |  | II | Moderately | 0 | 58.45 |  |  |  |  |  |  |  |  | GSE17536 |
| GSM437153 | GPL570 | 68 | M |  | II | Moderately | 0 | 45.99 |  |  |  |  |  |  |  |  | GSE17536 |
| GSM437154 | GPL570 | 71 | M |  | II | Moderately | 0 | 60.42 |  |  |  |  |  |  |  |  | GSE17536 |
| GSM437155 | GPL570 | 38 | F |  | II | Moderately | 0 | 37.67 |  |  |  |  |  |  |  |  | GSE17536 |
| GSM437156 | GPL570 | 73 | M |  | II | Moderately | 0 | 15.71 |  |  |  |  |  |  |  |  | GSE17536 |
| GSM437157 | GPL570 | 59 | F |  | II | Poorly | 0 | 39.25 |  |  |  |  |  |  |  |  | GSE17536 |
| GSM437158 | GPL570 | 76 | F |  | II | Moderately | 0 | 49.87 |  |  |  |  |  |  |  |  | GSE17536 |
| GSM437159 | GPL570 | 71 | M |  | II | Moderately | 0 | 25.24 |  |  |  |  |  |  |  |  | GSE17536 |
| GSM437160 | GPL570 | 58 | M |  | II | Moderately | 0 | 44.97 |  |  |  |  |  |  |  |  | GSE17536 |
| GSM437161 | GPL570 | 60 | M |  | II | Moderately | 0 | 35.9 |  |  |  |  |  |  |  |  | GSE17536 |
| GSM437162 | GPL570 | 71 | M |  | II | Moderately | 0 | 26.66 |  |  |  |  |  |  |  |  | GSE17536 |
| GSM437163 | GPL570 | 64 | F |  | II | Moderately | 0 | 36.78 |  |  |  |  |  |  |  |  | GSE17536 |
| GSM437164 | GPL570 | 84 | F |  | II | Moderately | 0 | 41.52 |  |  |  |  |  |  |  |  | GSE17536 |
| GSM437165 | GPL570 | 87 | F |  | II | Moderately | 0 | 22.22 |  |  |  |  |  |  |  |  | GSE17536 |
| GSM437166 | GPL570 | 51 | M |  | II | Moderately | 0 | 33.2 |  |  |  |  |  |  |  |  | GSE17536 |
| GSM437167 | GPL570 | 69 | M |  | II | Moderately | 0 | 39.68 |  |  |  |  |  |  |  |  | GSE17536 |
| GSM437168 | GPL570 | 78 | M |  | II | Moderately | 0 | 25.61 |  |  |  |  |  |  |  |  | GSE17536 |
| GSM437169 | GPL570 | 65 | F |  | II | Moderately | 0 | 83.99 |  |  |  |  |  |  |  |  | GSE17536 |
| GSM437170 | GPL570 | 54 | M |  | II | Moderately | 0 | 15.05 |  |  |  |  |  |  |  |  | GSE17536 |
| GSM437171 | GPL570 | 40 | F |  | II | Well | 0 | 8.38 |  |  |  |  |  |  |  |  | GSE17536 |
| GSM437172 | GPL570 | 68 | M |  | II | Moderately | 0 | 18.18 |  |  |  |  |  |  |  |  | GSE17536 |
| GSM437173 | GPL570 | 52 | F |  | II | Moderately | 1 | 27.15 |  |  |  |  |  |  |  |  | GSE17536 |
| GSM437174 | GPL570 | 46 | M |  | III | Moderately | 1 | 24.26 |  |  |  |  |  |  |  |  | GSE17536 |
| GSM437175 | GPL570 | 39 | M |  | III | Moderately | 0 | 105.17 |  |  |  |  |  |  |  |  | GSE17536 |
| GSM437176 | GPL570 | 38 | M |  | III | Moderately | 1 | 11.76 |  |  |  |  |  |  |  |  | GSE17536 |
| GSM437177 | GPL570 | 26 | M |  | III | Moderately | 1 | 70.45 |  |  |  |  |  |  |  |  | GSE17536 |
| GSM437178 | GPL570 | 71 | F |  | III | Moderately | 0 | 95.07 |  |  |  |  |  |  |  |  | GSE17536 |
| GSM437179 | GPL570 | 64 | F |  | III | Moderately | 0 | 112.33 |  |  |  |  |  |  |  |  | GSE17536 |
| GSM437180 | GPL570 | 53 | M |  | III | Well | 1 | 27.51 |  |  |  |  |  |  |  |  | GSE17536 |
| GSM437181 | GPL570 | 53 | F |  | III | Moderately | 1 | 45.92 |  |  |  |  |  |  |  |  | GSE17536 |
| GSM437182 | GPL570 | 92 | F |  | III | Moderately | 1 | 54.04 |  |  |  |  |  |  |  |  | GSE17536 |
| GSM437183 | GPL570 | 60 | M |  | III | Well | 0 | 103.98 |  |  |  |  |  |  |  |  | GSE17536 |
| GSM437184 | GPL570 | 74 | M |  | III | Poorly | 1 | 6.11 |  |  |  |  |  |  |  |  | GSE17536 |
| GSM437185 | GPL570 | 48 | F |  | III | Well | 0 | 99.51 |  |  |  |  |  |  |  |  | GSE17536 |
| GSM437186 | GPL570 | 63 | M |  | III | Moderately | 1 | 20.44 |  |  |  |  |  |  |  |  | GSE17536 |
| GSM437187 | GPL570 | 58 | M |  | III | Poorly | 1 | 76.6 |  |  |  |  |  |  |  |  | GSE17536 |
| GSM437188 | GPL570 | 75 | M |  | III | Moderately | 1 | 10.02 |  |  |  |  |  |  |  |  | GSE17536 |
| GSM437189 | GPL570 | 63 | M |  | III | Moderately | 1 | 41.45 |  |  |  |  |  |  |  |  | GSE17536 |
| GSM437190 | GPL570 | 46 | M |  | III | Moderately | 0 | 96.26 |  |  |  |  |  |  |  |  | GSE17536 |
| GSM437191 | GPL570 | 71 | F |  | III | Moderately | 0 | 85.61 |  |  |  |  |  |  |  |  | GSE17536 |
| GSM437192 | GPL570 | 63 | M |  | III | Moderately | 0 | 78.87 |  |  |  |  |  |  |  |  | GSE17536 |
| GSM437193 | GPL570 | 87 | F |  | III | Well | 1 | 22.25 |  |  |  |  |  |  |  |  | GSE17536 |
| GSM437194 | GPL570 | 63 | M |  | III | Moderately | 0 | 74.53 |  |  |  |  |  |  |  |  | GSE17536 |
| GSM437195 | GPL570 | 87 | M |  | III | Moderately | 1 | 59.07 |  |  |  |  |  |  |  |  | GSE17536 |
| GSM437196 | GPL570 | 30 | M |  | III | Poorly | 1 | 47.8 |  |  |  |  |  |  |  |  | GSE17536 |
| GSM437197 | GPL570 | 83 | F |  | III | Moderately | 1 | 5.68 |  |  |  |  |  |  |  |  | GSE17536 |
| GSM437198 | GPL570 | 55 | M |  | III | Well | 0 | 79.39 |  |  |  |  |  |  |  |  | GSE17536 |
| GSM437199 | GPL570 | 66 | M |  | III | Moderately | 0 | 74.07 |  |  |  |  |  |  |  |  | GSE17536 |
| GSM437200 | GPL570 | 69 | M |  | III | Moderately | 1 | 50.76 |  |  |  |  |  |  |  |  | GSE17536 |
| GSM437201 | GPL570 | 64 | F |  | III | Moderately | 1 | 67.82 |  |  |  |  |  |  |  |  | GSE17536 |
| GSM437202 | GPL570 | 62 | M |  | III | Poorly | 0 | 70.84 |  |  |  |  |  |  |  |  | GSE17536 |
| GSM437203 | GPL570 | 67 | F |  | III | Poorly | 0 | 50.59 |  |  |  |  |  |  |  |  | GSE17536 |
| GSM437204 | GPL570 | 57 | M |  | III | Moderately | 1 | 34.58 |  |  |  |  |  |  |  |  | GSE17536 |
| GSM437205 | GPL570 | 73 | F |  | III | Moderately | 1 | 38.72 |  |  |  |  |  |  |  |  | GSE17536 |
| GSM437206 | GPL570 | 83 | F |  | III | Moderately | 1 | 54.9 |  |  |  |  |  |  |  |  | GSE17536 |
| GSM437207 | GPL570 | 65 | F |  | III | Moderately | 0 | 67.92 |  |  |  |  |  |  |  |  | GSE17536 |
| GSM437208 | GPL570 | 63 | F |  | III | Moderately | 0 | 58.45 |  |  |  |  |  |  |  |  | GSE17536 |
| GSM437209 | GPL570 | 69 | M |  | III | Poorly | 0 | 59.34 |  |  |  |  |  |  |  |  | GSE17536 |
| GSM437210 | GPL570 | 71 | F |  | III | Moderately | 0 | 54.54 |  |  |  |  |  |  |  |  | GSE17536 |
| GSM437211 | GPL570 | 51 | F |  | III | Poorly | 1 | 19.03 |  |  |  |  |  |  |  |  | GSE17536 |
| GSM437212 | GPL570 | 78 | F |  | III | Poorly | 1 | 26.26 |  |  |  |  |  |  |  |  | GSE17536 |
| GSM437213 | GPL570 | 72 | M |  | III | Poorly | 0 | 52.86 |  |  |  |  |  |  |  |  | GSE17536 |
| GSM437214 | GPL570 | 46 | M |  | III | Moderately | 1 | 32.05 |  |  |  |  |  |  |  |  | GSE17536 |
| GSM437215 | GPL570 | 67 | M |  | III | Moderately | 0 | 55.95 |  |  |  |  |  |  |  |  | GSE17536 |
| GSM437216 | GPL570 | 67 | M |  | III | Poorly | 0 | 56.67 |  |  |  |  |  |  |  |  | GSE17536 |
| GSM437217 | GPL570 | 26 | M |  | III | Moderately | 0 | 50.43 |  |  |  |  |  |  |  |  | GSE17536 |
| GSM437218 | GPL570 | 78 | F |  | III | Moderately | 1 | 4.24 |  |  |  |  |  |  |  |  | GSE17536 |
| GSM437219 | GPL570 | 71 | F |  | III | Moderately | 0 | 49.11 |  |  |  |  |  |  |  |  | GSE17536 |
| GSM437220 | GPL570 | 60 | F |  | III | Moderately | 0 | 49.57 |  |  |  |  |  |  |  |  | GSE17536 |
| GSM437221 | GPL570 | 46 | M |  | III | Moderately | 0 | 50.49 |  |  |  |  |  |  |  |  | GSE17536 |
| GSM437222 | GPL570 | 41 | M |  | III | Moderately | 0 | 63.05 |  |  |  |  |  |  |  |  | GSE17536 |
| GSM437223 | GPL570 | 75 | F |  | III | Moderately | 1 | 49.24 |  |  |  |  |  |  |  |  | GSE17536 |
| GSM437224 | GPL570 | 54 | M |  | III | Moderately | 0 | 0.92 |  |  |  |  |  |  |  |  | GSE17536 |
| GSM437225 | GPL570 | 78 | F |  | III | Moderately | 0 | 31.36 |  |  |  |  |  |  |  |  | GSE17536 |
| GSM437226 | GPL570 | 61 | F |  | III | Moderately | 0 | 40.3 |  |  |  |  |  |  |  |  | GSE17536 |
| GSM437227 | GPL570 | 74 | M |  | III | Moderately | 0 | 116.64 |  |  |  |  |  |  |  |  | GSE17536 |
| GSM437228 | GPL570 | 79 | F |  | III | Moderately | 0 | 31.92 |  |  |  |  |  |  |  |  | GSE17536 |
| GSM437229 | GPL570 | 81 | F |  | III | Poorly | 0 | 19.98 |  |  |  |  |  |  |  |  | GSE17536 |
| GSM437230 | GPL570 | 62 | F |  | III | Moderately | 0 | 24.62 |  |  |  |  |  |  |  |  | GSE17536 |
| GSM437231 | GPL570 | 64 | M |  | IV | Moderately | 1 | 18.54 |  |  |  |  |  |  |  |  | GSE17536 |
| GSM437232 | GPL570 | 72 | F |  | IV | Moderately | 0 | 130.75 |  |  |  |  |  |  |  |  | GSE17536 |
| GSM437233 | GPL570 | 59 | F |  | IV | Well | 1 | 17.62 |  |  |  |  |  |  |  |  | GSE17536 |
| GSM437234 | GPL570 | 46 | M |  | IV | Moderately | 1 | 5.32 |  |  |  |  |  |  |  |  | GSE17536 |
| GSM437235 | GPL570 | 69 | M |  | IV | Poorly | 1 | 2.36 |  |  |  |  |  |  |  |  | GSE17536 |
| GSM437236 | GPL570 | 73 | M |  | IV | Moderately | 1 | 5.72 |  |  |  |  |  |  |  |  | GSE17536 |
| GSM437237 | GPL570 | 66 | M |  | IV | Moderately | 1 | 15.28 |  |  |  |  |  |  |  |  | GSE17536 |
| GSM437238 | GPL570 | 54 | M |  | IV | Moderately | 0 | 95.07 |  |  |  |  |  |  |  |  | GSE17536 |
| GSM437239 | GPL570 | 88 | M |  | IV | Moderately | 1 | 4.96 |  |  |  |  |  |  |  |  | GSE17536 |
| GSM437240 | GPL570 | 58 | M |  | IV | Moderately | 1 | 28.89 |  |  |  |  |  |  |  |  | GSE17536 |
| GSM437241 | GPL570 | 82 | F |  | IV | Poorly | 1 | 3.25 |  |  |  |  |  |  |  |  | GSE17536 |
| GSM437242 | GPL570 | 58 | F |  | IV | Poorly | 1 | 0.92 |  |  |  |  |  |  |  |  | GSE17536 |
| GSM437243 | GPL570 | 69 | M |  | IV | Moderately | 1 | 18.77 |  |  |  |  |  |  |  |  | GSE17536 |
| GSM437244 | GPL570 | 51 | M |  | IV | Moderately | 1 | 57.73 |  |  |  |  |  |  |  |  | GSE17536 |
| GSM437245 | GPL570 | 70 | F |  | IV | Moderately | 1 | 14.39 |  |  |  |  |  |  |  |  | GSE17536 |
| GSM437246 | GPL570 | 82 | F |  | IV | Moderately | 1 | 5.12 |  |  |  |  |  |  |  |  | GSE17536 |
| GSM437247 | GPL570 | 60 | M |  | IV | Poorly | 1 | 4.99 |  |  |  |  |  |  |  |  | GSE17536 |
| GSM437248 | GPL570 | 52 | M |  | IV | Poorly | 1 | 33.17 |  |  |  |  |  |  |  |  | GSE17536 |
| GSM437249 | GPL570 | 59 | M |  | IV | Moderately | 1 | 50.53 |  |  |  |  |  |  |  |  | GSE17536 |
| GSM437250 | GPL570 | 56 | M |  | IV | Poorly | 1 | 5.72 |  |  |  |  |  |  |  |  | GSE17536 |
| GSM437251 | GPL570 | 63 | M |  | IV | Moderately | 1 | 8.02 |  |  |  |  |  |  |  |  | GSE17536 |
| GSM437252 | GPL570 | 65 | F |  | IV | Moderately | 1 | 34.02 |  |  |  |  |  |  |  |  | GSE17536 |
| GSM437253 | GPL570 | 54 | M |  | IV | Poorly | 1 | 1.44 |  |  |  |  |  |  |  |  | GSE17536 |
| GSM437254 | GPL570 | 76 | M |  | IV | Poorly | 1 | 36.95 |  |  |  |  |  |  |  |  | GSE17536 |
| GSM437255 | GPL570 | 58 | F |  | IV | Moderately | 0 | 60.75 |  |  |  |  |  |  |  |  | GSE17536 |
| GSM437256 | GPL570 | 69 | F |  | IV | Moderately | 1 | 37.44 |  |  |  |  |  |  |  |  | GSE17536 |
| GSM437257 | GPL570 | 42 | F |  | IV | Moderately | 1 | 23.07 |  |  |  |  |  |  |  |  | GSE17536 |
| GSM437258 | GPL570 | 78 | F |  | IV | Moderately | 1 | 19.85 |  |  |  |  |  |  |  |  | GSE17536 |
| GSM437259 | GPL570 | 51 | M |  | IV | Moderately | 0 | 31.85 |  |  |  |  |  |  |  |  | GSE17536 |
| GSM437260 | GPL570 | 63 | M |  | IV | Moderately | 1 | 8.61 |  |  |  |  |  |  |  |  | GSE17536 |
| GSM437261 | GPL570 | 66 | M |  | IV | Moderately | 0 | 42.27 |  |  |  |  |  |  |  |  | GSE17536 |
| GSM437262 | GPL570 | 73 | M |  | IV | Moderately | 1 | 15.25 |  |  |  |  |  |  |  |  | GSE17536 |
| GSM437263 | GPL570 | 62 | M |  | IV | Moderately | 1 | 14.56 |  |  |  |  |  |  |  |  | GSE17536 |
| GSM437264 | GPL570 | 82 | F |  | IV | Moderately | 1 | 9.96 |  |  |  |  |  |  |  |  | GSE17536 |
| GSM437265 | GPL570 | 76 | M |  | IV | Moderately | 1 | 8.94 |  |  |  |  |  |  |  |  | GSE17536 |
| GSM437266 | GPL570 | 78 | F |  | IV | Poorly | 0 | 32.67 |  |  |  |  |  |  |  |  | GSE17536 |
| GSM437267 | GPL570 | 66 | F |  | IV | Poorly | 1 | 2.07 |  |  |  |  |  |  |  |  | GSE17536 |
| GSM437268 | GPL570 | 68 | M |  | IV | Moderately | 1 | 22.78 |  |  |  |  |  |  |  |  | GSE17536 |
| GSM437269 | GPL570 | 47 | M |  | IV | Moderately | 0 | 22.35 |  |  |  |  |  |  |  |  | GSE17536 |
| GSM437270 | GPL570 | 70 | F |  | II |  | 0 | 54.04931507 |  |  |  |  |  |  |  |  | GSE17537 |
| GSM437271 | GPL570 | 48 | F |  | III | Moderately | 0 | 63.91232877 |  |  |  |  |  |  |  |  | GSE17537 |
| GSM437272 | GPL570 | 72 | M |  | II | Moderately | 1 | 46.29041096 |  |  |  |  |  |  |  |  | GSE17537 |
| GSM437273 | GPL570 | 61 | F |  | III | Well | 0 | 60.03287671 |  |  |  |  |  |  |  |  | GSE17537 |
| GSM437274 | GPL570 | 56 | M |  | III |  | 1 | 48.2630137 |  |  |  |  |  |  |  |  | GSE17537 |
| GSM437275 | GPL570 | 57 | F |  | III | Moderately | 0 | 60.03287671 |  |  |  |  |  |  |  |  | GSE17537 |
| GSM437276 | GPL570 | 74 | F |  | III | Moderately | 0 | 60.55890411 |  |  |  |  |  |  |  |  | GSE17537 |
| GSM437277 | GPL570 | 52 | M |  | III | Moderately | 0 | 57.0739726 |  |  |  |  |  |  |  |  | GSE17537 |
| GSM437278 | GPL570 | 70 | F |  | II | Moderately | 0 | 55.85753425 |  |  |  |  |  |  |  |  | GSE17537 |
| GSM437279 | GPL570 | 55 | M |  | I | Moderately | 0 | 64.86575342 |  |  |  |  |  |  |  |  | GSE17537 |
| GSM437280 | GPL570 | 84 | M |  | III | Moderately | 0 | 54.73972603 |  |  |  |  |  |  |  |  | GSE17537 |
| GSM437281 | GPL570 | 59 | M |  | II |  | 0 | 57.96164384 |  |  |  |  |  |  |  |  | GSE17537 |
| GSM437282 | GPL570 | 49 | M |  | III |  | 0 | 57.23835616 |  |  |  |  |  |  |  |  | GSE17537 |
| GSM437283 | GPL570 | 66 | F |  | I | Moderately | 0 | 59.76986301 |  |  |  |  |  |  |  |  | GSE17537 |
| GSM437284 | GPL570 | 55 | M |  | I |  | 0 | 62.4 |  |  |  |  |  |  |  |  | GSE17537 |
| GSM437285 | GPL570 | 81 | F |  | I | Moderately | 0 | 54.50958904 |  |  |  |  |  |  |  |  | GSE17537 |
| GSM437286 | GPL570 | 23 | F |  | IV |  | 1 | 3.616438356 |  |  |  |  |  |  |  |  | GSE17537 |
| GSM437287 | GPL570 | 69 | M |  | II |  | 0 | 49.44657534 |  |  |  |  |  |  |  |  | GSE17537 |
| GSM437288 | GPL570 | 63 | M |  | II |  | 0 | 64.17534247 |  |  |  |  |  |  |  |  | GSE17537 |
| GSM437289 | GPL570 | 47 | M |  | III |  | 0 | 50.20273973 |  |  |  |  |  |  |  |  | GSE17537 |
| GSM437290 | GPL570 | 62 | M |  | IV |  | 1 | 30.83835616 |  |  |  |  |  |  |  |  | GSE17537 |
| GSM437291 | GPL570 | 72 | M |  | II |  | 0 | 58.25753425 |  |  |  |  |  |  |  |  | GSE17537 |
| GSM437292 | GPL570 | 88 | F |  | IV |  | 1 | 40.99726027 |  |  |  |  |  |  |  |  | GSE17537 |
| GSM437293 | GPL570 | 29 | F |  | IV |  | 1 | 8.153424658 |  |  |  |  |  |  |  |  | GSE17537 |
| GSM437294 | GPL570 | 74 | F |  | III |  | 0 | 52.10958904 |  |  |  |  |  |  |  |  | GSE17537 |
| GSM437295 | GPL570 | 49 | M |  | IV |  | 1 | 5.22739726 |  |  |  |  |  |  |  |  | GSE17537 |
| GSM437296 | GPL570 | 51 | F |  | III |  | 0 | 111.4849315 |  |  |  |  |  |  |  |  | GSE17537 |
| GSM437297 | GPL570 | 78 | F |  | III | Poorly | 1 | 7.824657534 |  |  |  |  |  |  |  |  | GSE17537 |
| GSM437298 | GPL570 | 67 | M |  | II |  | 0 | 68.61369863 |  |  |  |  |  |  |  |  | GSE17537 |
| GSM437299 | GPL570 | 72 | M |  | II | Moderately | 0 | 68.05479452 |  |  |  |  |  |  |  |  | GSE17537 |
| GSM437300 | GPL570 | 61 | M |  | III |  | 0 | 50.1369863 |  |  |  |  |  |  |  |  | GSE17537 |
| GSM437301 | GPL570 | 42 | M |  | IV | Moderately | 0 | 70.84931507 |  |  |  |  |  |  |  |  | GSE17537 |
| GSM437302 | GPL570 | 57 | F |  | IV |  | 0 | 74.30136986 |  |  |  |  |  |  |  |  | GSE17537 |
| GSM437303 | GPL570 | 51 | M |  | III | Moderately | 0 | 46.45479452 |  |  |  |  |  |  |  |  | GSE17537 |
| GSM437304 | GPL570 | 54 | F |  | IV | Moderately | 0 | 76.76712329 |  |  |  |  |  |  |  |  | GSE17537 |
| GSM437305 | GPL570 | 65 | M |  | IV | Moderately | 1 | 23.40821918 |  |  |  |  |  |  |  |  | GSE17537 |
| GSM437306 | GPL570 | 75 | M |  | II |  | 1 | 21.63287671 |  |  |  |  |  |  |  |  | GSE17537 |
| GSM437307 | GPL570 | 94 | F |  | II |  | 1 | 33.10684932 |  |  |  |  |  |  |  |  | GSE17537 |
| GSM437308 | GPL570 | 78 | F |  | IV | Moderately | 0 | 69.17260274 |  |  |  |  |  |  |  |  | GSE17537 |
| GSM437309 | GPL570 | 63 | F |  | III | Poorly | 0 | 46.98082192 |  |  |  |  |  |  |  |  | GSE17537 |
| GSM437310 | GPL570 | 57 | F |  | II |  | 0 | 53.26027397 |  |  |  |  |  |  |  |  | GSE17537 |
| GSM437311 | GPL570 | 56 | F |  | III |  | 0 | 54.18082192 |  |  |  |  |  |  |  |  | GSE17537 |
| GSM437312 | GPL570 | 47 | M |  | III | Moderately | 0 | 40.66849315 |  |  |  |  |  |  |  |  | GSE17537 |
| GSM437313 | GPL570 | 51 | M |  | II | Moderately | 0 | 40.73424658 |  |  |  |  |  |  |  |  | GSE17537 |
| GSM437314 | GPL570 | 80 | F |  | III | Moderately | 1 | 13.84109589 |  |  |  |  |  |  |  |  | GSE17537 |
| GSM437315 | GPL570 | 54 | F |  | III | Moderately | 0 | 70.45479452 |  |  |  |  |  |  |  |  | GSE17537 |
| GSM437316 | GPL570 | 70 | F |  | IV | Moderately | 1 | 36 |  |  |  |  |  |  |  |  | GSE17537 |
| GSM437317 | GPL570 | 77 | F |  | IV | Poorly | 1 | 1.545205479 |  |  |  |  |  |  |  |  | GSE17537 |
| GSM437318 | GPL570 | 56 | M |  | IV |  | 1 | 17.65479452 |  |  |  |  |  |  |  |  | GSE17537 |
| GSM437319 | GPL570 | 38 | F |  | IV |  | 1 | 12.65753425 |  |  |  |  |  |  |  |  | GSE17537 |
| GSM437320 | GPL570 | 64 | F |  | IV |  | 1 | 6.904109589 |  |  |  |  |  |  |  |  | GSE17537 |
| GSM437321 | GPL570 | 62 | F |  | IV | Moderately | 1 | 32.51506849 |  |  |  |  |  |  |  |  | GSE17537 |
| GSM437322 | GPL570 | 60 | F |  | IV | Moderately | 1 | 16.14246575 |  |  |  |  |  |  |  |  | GSE17537 |
| GSM437323 | GPL570 | 93 | M |  | II | Moderately | 1 | 0.42739726 |  |  |  |  |  |  |  |  | GSE17537 |
| GSM437324 | GPL570 | 69 | M |  | II | Moderately | 0 | 41.42465753 |  |  |  |  |  |  |  |  | GSE17537 |
| GSM955440 | GPL570 | 34.5 | M | Left | IV |  | 1 | 10.33333333 | T4 | N2 | M1 |  | WT | MT | MT | MSS | GSE39084 |
| GSM955441 | GPL570 | 36.4 | F | Left | IV |  | 1 | 9.633333333 | T3 | N2 | M1 |  | WT | WT | WT | MSS | GSE39084 |
| GSM955442 | GPL570 | 36.9 | M | Right | II |  | 0 | 53.53333333 | T4 | N0 | M0 |  | WT | WT | MT | MSS | GSE39084 |
| GSM955443 | GPL570 | 38.2 | F | Left | I |  | 0 | 75.4 | T2 | N0 | M0 |  | WT | WT | MT | MSS | GSE39084 |
| GSM955444 | GPL570 | 38.8 | F | Left | I |  | 0 | 98.1 | T2 | N0 | M0 |  | WT | MT | WT | MSS | GSE39084 |
| GSM955445 | GPL570 | 38.9 | F | Right | IV |  | 1 | 100.8666667 | T3 | N0 | M1 |  | WT | WT | WT | MSS | GSE39084 |
| GSM955446 | GPL570 | 39.2 | F | Left | IV |  | 1 | 32.8 | T3 | N1 | M1 |  | WT | WT | MT | MSS | GSE39084 |
| GSM955447 | GPL570 | 60.9 | M | Right | III |  | 0 | 74 | T4 | N2 | M0 |  | WT | WT | WT | MSI | GSE39084 |
| GSM955448 | GPL570 | 78.2 | M | Right | II |  | 1 | 20.16666667 | T3 | N0 | M0 |  | WT | WT | WT | MSI | GSE39084 |
| GSM955449 | GPL570 | 45 | F | Left | IV |  | 1 | 32.43333333 | T3 | N2 | M1 |  | WT | WT | WT | MSS | GSE39084 |
| GSM955450 | GPL570 | 29.6 | F | Left | IV |  | 1 | 48.53333333 | T3 | N2 | M1 |  | WT | MT | MT | MSS | GSE39084 |
| GSM955451 | GPL570 | 33.5 | M | Left | II |  | 0 | 72.33333333 | T3 | N0 | M0 |  | WT | WT | WT | MSS | GSE39084 |
| GSM955452 | GPL570 | 35.4 | F | Left | III |  | 0 | 35.96666667 | T2 | N2 | M0 |  | WT | WT | MT | MSS | GSE39084 |
| GSM955453 | GPL570 | 37.5 | F | Left | II |  | 0 | 33.03333333 | T3 | N0 | M0 |  | WT | MT | WT | MSS | GSE39084 |
| GSM955454 | GPL570 | 40.5 | F | Left | III |  | 0 | 64.76666667 | T3 | N1 | M0 |  | WT | MT | MT | MSS | GSE39084 |
| GSM955455 | GPL570 | 42.6 | M | Right | II |  | 1 | 31.46666667 | T3 | N0 | M0 |  | WT | MT | WT | MSS | GSE39084 |
| GSM955456 | GPL570 | 43.5 | F | Left | III |  | 0 | 96.73333333 | T3 | N1 | M0 |  | WT | WT | MT | MSS | GSE39084 |
| GSM955457 | GPL570 | 44.9 | F | Right | II |  | 0 | 114.4 | T4 | N0 | M0 |  | WT | MT | MT | MSS | GSE39084 |
| GSM955458 | GPL570 | 30.2 | M | Left | I |  | 0 | 64.66666667 | T1 | N0 | M0 |  | WT | WT | WT | MSI | GSE39084 |
| GSM955459 | GPL570 | 31.7 | F | Right | I |  | 0 | 87.86666667 | T2 | N0 | M0 |  | WT | MT | WT | MSI | GSE39084 |
| GSM955460 | GPL570 | 34.7 | F | Right | IV |  | 0 | 66.63333333 | T4 | N2 | M1 |  | WT | MT | WT | MSI | GSE39084 |
| GSM955461 | GPL570 | 40.2 | M | Left | I |  | 0 | 76.6 | T2 | N0 | M0 |  | WT | WT | WT | MSI | GSE39084 |
| GSM955462 | GPL570 | 24.9 | M | Left | II |  | 0 | 46.86666667 | T3 | N0 | M0 |  | WT | WT | WT | MSS | GSE39084 |
| GSM955463 | GPL570 | 40.7 | F | Left | IV |  | 0 | 57.06666667 | T4 | N1 | M1 |  | WT | MT | MT | MSS | GSE39084 |
| GSM955464 | GPL570 | 41.9 | F | Left | II |  | 0 | 47.66666667 | T3 | N0 | M0 |  | WT | WT | WT | MSS | GSE39084 |
| GSM955465 | GPL570 | 45.2 | F | Left | II |  | 0 | 36.66666667 | T4 | N0 | M0 |  | WT | WT | MT | MSS | GSE39084 |
| GSM955466 | GPL570 | 40.8 | F | Right | III |  | 0 | 50.26666667 | T4 | N1 | M0 |  | WT | MT | WT | MSI | GSE39084 |
| GSM955467 | GPL570 | 71.4 | F | Right | I |  | 0 | 110.9333333 | T2 | N0 | M0 |  | WT | MT | MT | MSI | GSE39084 |
| GSM955468 | GPL570 | 66.4 | F | Right | II |  | 0 | 54 | T3 | N0 | M0 |  | WT | WT | WT | MSI | GSE39084 |
| GSM955469 | GPL570 | 76.9 | M | Right | III |  | 0 | 59.83333333 | T4 | N1 | M0 |  | MT | WT | WT | MSI | GSE39084 |
| GSM955470 | GPL570 | 81.8 | M | Right | II |  | 0 | 49.03333333 | T3 | N0 | M0 |  | WT | MT | WT | MSI | GSE39084 |
| GSM955471 | GPL570 | 79.3 | M | Right | III |  | 1 | 42.83333333 | T4 | N2 | M0 |  | WT | MT | MT | MSI | GSE39084 |
| GSM955472 | GPL570 | 75.3 | M | Right | III |  | 0 | 100.5 | T3 | N1 | M0 |  | MT | WT | MT | MSI | GSE39084 |
| GSM955473 | GPL570 | 68 | F | Right | II |  | 0 | 82.3 | T4 | N0 | M0 |  | MT | WT | WT | MSI | GSE39084 |
| GSM955474 | GPL570 | 66.6 | M | Right | I |  | 0 | 7.866666667 | T0 | N0 | M0 |  | WT | MT | WT | MSS | GSE39084 |
| GSM955475 | GPL570 | 66.3 | M | Right | II |  | 0 | 69.7 | T3 | N0 | M0 |  | WT | WT | MT | MSS | GSE39084 |
| GSM955476 | GPL570 | 66.7 | M | Right | II |  | 0 | 69.6 | T3 | N0 | M0 |  | WT | WT | WT | MSS | GSE39084 |
| GSM955477 | GPL570 | 77.2 | F | Right | IV |  | 1 | 18.83333333 | T4 | N1 | M1 |  | MT | WT | MT | MSS | GSE39084 |
| GSM955478 | GPL570 | 71.3 | M | Right | I |  | 1 | 24.43333333 | T2 | N0 | M0 |  | WT | MT | WT | MSS | GSE39084 |
| GSM955479 | GPL570 | 83.1 | M | Right | I |  | 1 | 12.86666667 | T2 | N0 | M0 |  | WT | MT | WT | MSS | GSE39084 |
| GSM955480 | GPL570 | 71.3 | M | Left | II |  | 1 | 56.36666667 | T3 | N0 | M0 |  | WT | WT | MT | MSS | GSE39084 |
| GSM955481 | GPL570 | 72.5 | F | Left | II |  | 1 | 60.83333333 | T3 | N0 | M0 |  | WT | MT | MT | MSS | GSE39084 |
| GSM955482 | GPL570 | 85.6 | M | Left | II |  | 1 | 21.33333333 | T4 | N0 | M0 |  | WT | WT | WT | MSS | GSE39084 |
| GSM955483 | GPL570 | 67.5 | M | Left | II |  | 0 | 57 | T3 | N0 | M0 |  | WT | MT | WT | MSS | GSE39084 |
| GSM955484 | GPL570 | 80.9 | M | Right | II |  | 0 | 43.86666667 | T3 | N0 | M0 |  | WT | WT | MT | MSS | GSE39084 |
| GSM955485 | GPL570 | 70.7 | F | Left | II |  | 0 | 98.93333333 | T3 | N0 | M0 |  | WT | MT | WT | MSS | GSE39084 |
| GSM955486 | GPL570 | 61.8 | F | Left | II |  | 0 | 25.86666667 | T4 | N0 | M0 |  | WT | WT | WT | MSS | GSE39084 |
| GSM955487 | GPL570 | 63 | F | Right | III |  | 0 | 77.33333333 | T3 | N1 | M0 |  | WT | WT | WT | MSS | GSE39084 |
| GSM955488 | GPL570 | 72 | M | Right | III |  | 0 | 90.26666667 | T3 | N2 | M0 |  | MT | WT | MT | MSS | GSE39084 |
| GSM955489 | GPL570 | 74.8 | M | Right | III |  | 1 | 23.46666667 | T3 | N1 | M0 |  | WT | MT | WT | MSS | GSE39084 |
| GSM955490 | GPL570 | 60.8 | M | Left | III |  | 1 | 45.8 | T2 | N1 | M0 |  | WT | WT | MT | MSS | GSE39084 |
| GSM955491 | GPL570 | 61.5 | M | Left | III |  | 0 | 1.6 | T3 | N1 | M0 |  | WT | WT | MT | MSS | GSE39084 |
| GSM955492 | GPL570 | 76.4 | F | Left | III |  | 0 | 9.433333333 | T3 | N2 | M0 |  | WT | WT | WT | MSS | GSE39084 |
| GSM955493 | GPL570 | 71.5 | M | Left | III |  | 0 | 74.13333333 | T2 | N1 | M0 |  | WT | WT | MT | MSS | GSE39084 |
| GSM955494 | GPL570 | 77.8 | M | Left | III |  | 0 | 26.46666667 | T4 | N1 | M0 |  | WT | MT | MT | MSS | GSE39084 |
| GSM955495 | GPL570 | 64.6 | M | Right | IV |  | 1 | 27.86666667 | T3 | N2 | M1 |  | WT | MT | WT | MSS | GSE39084 |
| GSM955496 | GPL570 | 62.9 | F | Right | IV |  | 0 | 90.13333333 | T3 | N1 | M1 |  | WT | MT | MT | MSS | GSE39084 |
| GSM955497 | GPL570 | 66.1 | M | Right | IV |  | 0 | 44.8 | T4 | N1 | M1 |  | WT | MT | MT | MSS | GSE39084 |
| GSM955498 | GPL570 | 67.5 | F | Left | IV |  | 1 | 23.7 | T3 | N0 | M1 |  | WT | WT | WT | MSS | GSE39084 |
| GSM955499 | GPL570 | 71 | M | Right | IV |  | 1 | 2.1 | T4 | N2 | M1 |  | MT | WT | WT | MSS | GSE39084 |
| GSM955500 | GPL570 | 67.3 | M | Left | IV |  | 1 | 73.76666667 | T4 | N2 | M1 |  | MT | WT | MT | MSS | GSE39084 |
| GSM955501 | GPL570 | 67.8 | F | Left | IV |  | 1 | 11.83333333 | T4 | N2 | M1 |  | WT | MT | MT | MSS | GSE39084 |
| GSM955502 | GPL570 | 68.1 | M | Left | IV |  | 1 | 11.13333333 | T3 | N2 | M1 |  | WT | MT | MT | MSS | GSE39084 |
| GSM955503 | GPL570 | 74.5 | M | Left | IV |  | 1 | 47.63333333 | T3 | N1 | M1 |  | WT | MT | WT | MSS | GSE39084 |
| GSM955504 | GPL570 | 75.3 | F | Left | IV |  | 1 | 21.33333333 | T4 | N1 | M1 |  | MT | WT | WT | MSS | GSE39084 |
| GSM955505 | GPL570 | 86.8 | F | Right | IV |  | 0 | 92.83333333 | T3 | N1 | M1 |  | WT | MT | WT | MSS | GSE39084 |
| GSM955506 | GPL570 | 89.4 | F | Left | IV |  | 1 | 43.8 | T2 | N1 | M1 |  | WT | WT | WT | MSS | GSE39084 |
| GSM955507 | GPL570 | 65.8 | M | Left | IV |  | 1 | 28.86666667 | T3 | N0 | M1 |  | WT | WT | MT | MSS | GSE39084 |
| GSM955508 | GPL570 | 92.4 | F | Left | II |  | 0 | 92.86666667 | T3 | N0 | M0 |  | WT | MT | WT | MSI | GSE39084 |
| GSM955509 | GPL570 | 74.5 | F | Right | II |  | 1 | 16.73333333 | T3 | N0 | M0 |  | WT | WT | MT | MSI | GSE39084 |
| GSM971957 | GPL570 | 34.5 | M | Left | IV |  | 1 | 10 | T4 | N2 | M1 |  | WT | MT | MT |  | GSE39582 |
| GSM971958 | GPL570 | 36.4 | F | Left | IV |  | 1 | 9 | T3 | N2 | M1 |  | WT | WT | WT |  | GSE39582 |
| GSM971959 | GPL570 | 36.9 | M | Right | II |  | 0 | 52 | T4 | N0 | M0 |  | WT | WT | MT |  | GSE39582 |
| GSM971960 | GPL570 | 38.2 | F | Left | I |  | 0 | 74 | T2 | N0 | M0 |  | WT | WT | MT |  | GSE39582 |
| GSM971961 | GPL570 | 39.2 | F | Left | IV |  | 1 | 32 | T3 | N1 | M1 |  | WT | WT | MT |  | GSE39582 |
| GSM971962 | GPL570 | 60.9 | M | Right | III |  | 0 | 73 | T4 | N2 | M0 |  | WT | WT | WT |  | GSE39582 |
| GSM971963 | GPL570 | 78.2 | M | Right | II |  | 1 | 20 | T3 | N0 | M0 |  | WT | WT | WT |  | GSE39582 |
| GSM971964 | GPL570 | 35.4 | F | Left | III |  | 0 | 35 | T2 | N2 | M0 |  | WT | WT | MT |  | GSE39582 |
| GSM971965 | GPL570 | 37.5 | F | Left | II |  | 0 | 33 | T3 | N0 | M0 |  | WT | MT | WT |  | GSE39582 |
| GSM971966 | GPL570 | 40.5 | F | Left | III |  | 0 | 63 | T3 | N1 | M0 |  | WT | MT | MT |  | GSE39582 |
| GSM971967 | GPL570 | 42.6 | M | Right | II |  | 1 | 31 | T3 | N0 | M0 |  | WT | MT | WT |  | GSE39582 |
| GSM971968 | GPL570 | 44.9 | F | Right | II |  | 0 | 112 | T4 | N0 | M0 |  | WT | MT | MT |  | GSE39582 |
| GSM971969 | GPL570 | 30.2 | M | Left | I |  | 0 | 63 | T1 | N0 | M0 |  | WT | WT | WT |  | GSE39582 |
| GSM971970 | GPL570 | 31.7 | F | Right | I |  | 0 | 86 | T2 | N0 | M0 |  | WT | MT | WT |  | GSE39582 |
| GSM971971 | GPL570 | 34.7 | F | Right | IV |  | 0 | 65 | T4 | N2 | M1 |  | WT | MT | WT |  | GSE39582 |
| GSM971972 | GPL570 | 40.2 | M | Left | I |  | 0 | 75 | T2 | N0 | M0 |  | WT | WT | WT |  | GSE39582 |
| GSM971973 | GPL570 | 24.9 | M | Left | II |  | 0 | 46 | T3 | N0 | M0 |  | WT | WT | WT |  | GSE39582 |
| GSM971974 | GPL570 | 40.7 | F | Left | IV |  | 0 | 56 | T4 | N1 | M1 |  | WT | MT | MT |  | GSE39582 |
| GSM971975 | GPL570 | 41.9 | F | Left | II |  | 0 | 46 | T3 | N0 | M0 |  | WT | WT | WT |  | GSE39582 |
| GSM971976 | GPL570 | 45.2 | F | Left | II |  | 0 | 36 | T4 | N0 | M0 |  | WT | WT | MT |  | GSE39582 |
| GSM971977 | GPL570 | 40.8 | F | Right | III |  | 0 | 49 | T4 | N1 | M0 |  | WT | MT | WT |  | GSE39582 |
| GSM971978 | GPL570 | 71.4 | F | Right | I |  | 0 | 109 | T2 | N0 | M0 |  | WT | MT | MT |  | GSE39582 |
| GSM971979 | GPL570 | 66.4 | F | Right | II |  | 0 | 53 | T3 | N0 | M0 |  | WT | WT | WT |  | GSE39582 |
| GSM971980 | GPL570 | 76.9 | M | Right | III |  | 0 | 59 | T4 | N1 | M0 |  | MT | WT | WT |  | GSE39582 |
| GSM971981 | GPL570 | 81.8 | M | Right | II |  | 0 | 48 | T3 | N0 | M0 |  | WT | MT | WT |  | GSE39582 |
| GSM971982 | GPL570 | 79.3 | M | Right | III |  | 1 | 42 | T4 | N2 | M0 |  | WT | MT | MT |  | GSE39582 |
| GSM971983 | GPL570 | 75.3 | M | Right | III |  | 0 | 87 | T3 | N1 | M0 |  | MT | WT | MT |  | GSE39582 |
| GSM971984 | GPL570 | 68 | F | Right | II |  | 0 | 81 | T4 | N0 | M0 |  | MT | WT | WT |  | GSE39582 |
| GSM971986 | GPL570 | 66.3 | M | Right | II |  | 0 | 68 | T3 | N0 | M0 |  | WT | WT | MT |  | GSE39582 |
| GSM971987 | GPL570 | 66.7 | M | Right | II |  | 0 | 68 | T3 | N0 | M0 |  | WT | WT | WT |  | GSE39582 |
| GSM971988 | GPL570 | 77.2 | F | Right | IV |  | 1 | 18 | T4 | N1 | M1 |  | MT | WT | MT |  | GSE39582 |
| GSM971989 | GPL570 | 71.3 | M | Right | I |  | 1 | 24 | T2 | N0 | M0 |  | WT | MT | WT |  | GSE39582 |
| GSM971990 | GPL570 | 83.1 | M | Right | I |  | 1 | 12 | T2 | N0 | M0 |  | WT | MT | WT |  | GSE39582 |
| GSM971991 | GPL570 | 71.3 | M | Left | II |  | 1 | 55 | T3 | N0 | M0 |  | WT | WT | MT |  | GSE39582 |
| GSM971992 | GPL570 | 85.6 | M | Left | II |  | 1 | 20 | T4 | N0 | M0 |  | WT | WT | WT |  | GSE39582 |
| GSM971993 | GPL570 | 67.5 | M | Left | II |  | 0 | 56 | T3 | N0 | M0 |  | WT | MT | WT |  | GSE39582 |
| GSM971994 | GPL570 | 80.9 | M | Right | II |  | 0 | 43 | T3 | N0 | M0 |  | WT | WT | MT |  | GSE39582 |
| GSM971995 | GPL570 | 61.8 | F | Left | II |  | 0 | 25 | T4 | N0 | M0 |  | WT | WT | WT |  | GSE39582 |
| GSM971996 | GPL570 | 63 | F | Right | III |  | 0 | 76 | T3 | N1 | M0 |  | WT | WT | WT |  | GSE39582 |
| GSM971997 | GPL570 | 72 | M | Right | III |  | 0 | 89 | T3 | N2 | M0 |  | MT | WT | MT |  | GSE39582 |
| GSM971998 | GPL570 | 74.8 | M | Right | III |  | 1 | 23 | T3 | N1 | M0 |  | WT | MT | WT |  | GSE39582 |
| GSM971999 | GPL570 | 61.5 | M | Left | III |  | 0 | 1 | T3 | N1 | M0 |  | WT | WT | MT |  | GSE39582 |
| GSM972000 | GPL570 | 76.4 | F | Left | III |  | 0 | 9 | T3 | N2 | M0 |  | WT | WT | WT |  | GSE39582 |
| GSM972001 | GPL570 | 71.5 | M | Left | III |  | 0 | 73 | T2 | N1 | M0 |  | WT | WT | MT |  | GSE39582 |
| GSM972002 | GPL570 | 77.8 | M | Left | III |  | 0 | 26 | T4 | N1 | M0 |  | WT | MT | MT |  | GSE39582 |
| GSM972003 | GPL570 | 64.6 | M | Right | IV |  | 1 | 27 | T3 | N2 | M1 |  | WT | MT | WT |  | GSE39582 |
| GSM972004 | GPL570 | 62.9 | F | Right | IV |  | 0 | 89 | T3 | N1 | M1 |  | WT | MT | MT |  | GSE39582 |
| GSM972005 | GPL570 | 66.1 | M | Right | IV |  | 0 | 44 | T4 | N1 | M1 |  | WT | MT | MT |  | GSE39582 |
| GSM972006 | GPL570 | 67.5 | F | Left | IV |  | 1 | 23 | T3 | N0 | M1 |  | WT | WT | WT |  | GSE39582 |
| GSM972007 | GPL570 | 71 | M | Right | IV |  | 1 | 2 | T4 | N2 | M1 |  | MT | WT | WT |  | GSE39582 |
| GSM972008 | GPL570 | 67.3 | M | Left | IV |  | 1 | 72 | T4 | N2 | M1 |  | MT | WT | MT |  | GSE39582 |
| GSM972009 | GPL570 | 68.1 | M | Left | IV |  | 1 | 10 | T3 | N2 | M1 |  | WT | MT | MT |  | GSE39582 |
| GSM972010 | GPL570 | 74.5 | M | Left | IV |  | 1 | 46 | T3 | N1 | M1 |  | WT | MT | WT |  | GSE39582 |
| GSM972011 | GPL570 | 75.3 | F | Left | IV |  | 1 | 20 | T4 | N1 | M1 |  | MT | WT | WT |  | GSE39582 |
| GSM972012 | GPL570 | 86.8 | F | Right | IV |  | 0 | 101 | T3 | N1 | M1 |  | WT | MT | WT |  | GSE39582 |
| GSM972013 | GPL570 | 89.4 | F | Left | IV |  | 1 | 43 | T2 | N1 | M1 |  | WT | WT | WT |  | GSE39582 |
| GSM972014 | GPL570 | 65.8 | M | Left | IV |  | 1 | 29 | T3 | N0 | M1 |  | WT | WT | MT |  | GSE39582 |
| GSM972015 | GPL570 | 92.4 | F | Left | II |  | 0 | 91 | T3 | N0 | M0 |  | WT | MT | WT |  | GSE39582 |
| GSM972016 | GPL570 | 74.5 | F | Right | II |  | 1 | 16 | T3 | N0 | M0 |  | WT | WT | MT |  | GSE39582 |
| GSM972017 | GPL570 | 73 | F | Right | III |  | 0 | 43 | T3 | N2 | M0 |  | WT | MT |  |  | GSE39582 |
| GSM972018 | GPL570 | 68 | F | Left | III |  | 0 | 117 | T2 | N2 | M0 |  | WT | WT |  |  | GSE39582 |
| GSM972019 | GPL570 | 54 | M | Right | III |  | 1 | 25 | T3 | N3 | M0 |  | MT | WT |  |  | GSE39582 |
| GSM972020 | GPL570 | 49 | F | Left | III |  | 0 | 78 | T3 | N2 | M0 |  | WT | WT |  |  | GSE39582 |
| GSM972021 | GPL570 | 58 | F | Left | III |  | 1 | 37 | T3 | N2 | M0 |  | WT | WT |  |  | GSE39582 |
| GSM972022 | GPL570 | 76 | F | Right | III |  | 0 | 82 | T3 | N2 | M0 |  | WT | MT |  |  | GSE39582 |
| GSM972023 | GPL570 | 59 | F | Left | III |  | 0 | 16 | T3 | N1 | M0 |  | WT | MT |  |  | GSE39582 |
| GSM972024 | GPL570 | 62 | M | Left | III |  | 0 | 43 | T2 | N2 | M0 |  | WT | WT |  |  | GSE39582 |
| GSM972025 | GPL570 | 49 | M | Left | III |  | 0 | 53 | T3 | N2 | M0 |  | WT | WT |  |  | GSE39582 |
| GSM972026 | GPL570 | 75 | M | Left | III |  | 1 | 34 | T3 | N2 | M0 |  |  | WT |  |  | GSE39582 |
| GSM972027 | GPL570 | 70 | F | Right | III |  | 0 | 94 | T3 | N2 | M0 |  | WT | WT |  |  | GSE39582 |
| GSM972028 | GPL570 | 46 | F | Right | III |  | 0 | 78 | T3 | N2 | M0 |  | WT | MT |  |  | GSE39582 |
| GSM972029 | GPL570 | 58 | M | Left | III |  | 0 | 36 | T4 | N2 | M0 |  | WT | WT |  |  | GSE39582 |
| GSM972030 | GPL570 | 68 | F | Right | III |  | 0 | 52 | T3 | N3 | M0 |  | MT | WT |  |  | GSE39582 |
| GSM972031 | GPL570 | 81 | M | Left | II |  | 0 | 55 | T3 | N0 | M0 |  |  |  |  |  | GSE39582 |
| GSM972032 | GPL570 | 64 | F | Right | II |  | 0 | 60 | T3 | N0 | M0 |  | WT | WT |  |  | GSE39582 |
| GSM972033 | GPL570 | 45 | F | Left | II |  | 0 | 50 | T4 | N0 | M0 |  |  |  |  |  | GSE39582 |
| GSM972034 | GPL570 | 77 | M | Right | II |  | 0 | 50 | T3 | N0 | M0 |  | WT | MT |  |  | GSE39582 |
| GSM972035 | GPL570 | 94 | F | Right | II |  | 0 | 39 | T3 | N0 | M0 |  | WT | WT |  |  | GSE39582 |
| GSM972036 | GPL570 | 47 | F | Right | II |  | 0 | 50 | T4 | N0 | M0 |  |  |  |  |  | GSE39582 |
| GSM972037 | GPL570 | 78 | M | Right | II |  | 0 | 33 | T4 | N0 | M0 |  | WT | MT |  |  | GSE39582 |
| GSM972038 | GPL570 | 61 | M | Left | II |  | 1 | 1 | T3 | N0 | M0 |  | WT | WT |  |  | GSE39582 |
| GSM972039 | GPL570 | 65 | M | Left | IV |  | 1 | 52 | T4 | N0 | M1 |  | WT | WT |  |  | GSE39582 |
| GSM972040 | GPL570 | 81 | M | Left | II |  | 0 | 63 | T3 | N0 | M0 |  | WT | WT |  |  | GSE39582 |
| GSM972041 | GPL570 | 78 | M | Left | II |  | 0 | 55 | T3 | N0 | M0 |  | WT | MT |  |  | GSE39582 |
| GSM972042 | GPL570 | 83 | M | Right | II |  | 0 | 51 | T3 | N0 | M0 |  | WT | MT |  |  | GSE39582 |
| GSM972043 | GPL570 | 56 | M | Left | IV |  | 1 | 27 | T3 | N0 | M1 |  | WT | WT |  |  | GSE39582 |
| GSM972044 | GPL570 | 58 | M | Right | II |  | 0 | 42 | T4 | N0 | M0 |  | WT | WT |  |  | GSE39582 |
| GSM972045 | GPL570 | 71 | M | Right | IV |  | 1 | 11 | T3 | N0 | M1 |  | WT | MT |  |  | GSE39582 |
| GSM972046 | GPL570 | 54 | M | Left | II |  | 0 | 58 | T3 | N0 | M0 |  | WT | WT |  |  | GSE39582 |
| GSM972047 | GPL570 | 93 | F | Right | II |  | 0 | 33 | T3 | N0 | M0 |  | WT | MT |  |  | GSE39582 |
| GSM972048 | GPL570 | 50 | F | Left | IV |  | 0 | 30 | T4 | N0 | M1 |  | WT | MT |  |  | GSE39582 |
| GSM972049 | GPL570 | 79 | M | Right | II |  | 0 | 26 | T3 | N0 | M0 |  | WT | MT |  |  | GSE39582 |
| GSM972050 | GPL570 | 75 | F | Left | II |  | 0 | 19 | T3 | N0 | M0 |  | WT | MT |  |  | GSE39582 |
| GSM972051 | GPL570 | 34 | F | Left | IV |  | 1 | 28 | T3 | N0 | M1 |  | WT | MT |  |  | GSE39582 |
| GSM972052 | GPL570 | 68 | M | Left | II |  | 0 | 15 | T2 | N0 | M0 |  | WT | MT |  |  | GSE39582 |
| GSM972053 | GPL570 | 55 | M | Right | II |  | 0 | 29 | T2 | N0 | M0 |  | WT | WT |  |  | GSE39582 |
| GSM972054 | GPL570 | 82 | M | Right | II |  | 0 | 26 | T3 | N0 | M0 |  | WT | MT |  |  | GSE39582 |
| GSM972055 | GPL570 | 31 | F | Left | II |  | 0 | 93 | T4 | N0 | M0 |  | WT | WT |  |  | GSE39582 |
| GSM972056 | GPL570 | 78 | F | Right | II |  | 0 | 92 | T4 | N0 | M0 |  | MT | WT |  |  | GSE39582 |
| GSM972057 | GPL570 | 70 | M | Left | II |  | 1 | 26 | T3 | N0 | M0 |  | WT | WT |  |  | GSE39582 |
| GSM972058 | GPL570 | 75 | F | Right | II |  | 0 | 60 | T3 | N0 | M0 |  | MT | WT |  |  | GSE39582 |
| GSM972059 | GPL570 | 76 | F | Left | II |  | 0 | 59 | T3 | N0 | M0 |  | MT | WT |  |  | GSE39582 |
| GSM972060 | GPL570 | 66 | M | Left | II |  | 0 | 82 | T3 | N0 | M0 |  | WT | WT |  |  | GSE39582 |
| GSM972061 | GPL570 | 78 | F | Left | II |  | 1 | 43 | T4 | N0 | M0 |  | WT | WT |  |  | GSE39582 |
| GSM972062 | GPL570 | 43 | F | Left | II |  | 1 | 23 | T4 | N0 | M0 |  | WT | MT |  |  | GSE39582 |
| GSM972063 | GPL570 | 54 | M | Left | II |  | 0 | 70 | T3 | N0 | M0 |  | WT | MT |  |  | GSE39582 |
| GSM972064 | GPL570 | 60 | M | Left | IV |  | 1 | 22 | T4 | N0 | M1 |  | WT | MT |  |  | GSE39582 |
| GSM972065 | GPL570 | 48 | M | Left | II |  | 0 | 46 | T3 | N0 | M0 |  | WT | WT |  |  | GSE39582 |
| GSM972066 | GPL570 | 69 | M | Left | IV |  | 0 | 49 | T4 | N0 | M1 |  | WT | WT |  |  | GSE39582 |
| GSM972067 | GPL570 | 83 | F | Left | II |  | 1 | 183 | T3 | N0 | M0 |  | WT | WT |  |  | GSE39582 |
| GSM972068 | GPL570 | 44 | M | Left | II |  | 1 | 22 | T4 | N0 | M0 |  | WT | MT |  |  | GSE39582 |
| GSM972069 | GPL570 | 68 | M | Right | II |  | 0 | 201 | T3 | N0 | M0 |  | WT | MT |  |  | GSE39582 |
| GSM972070 | GPL570 | 64 | F | Left | II |  | 1 | 68 | T4 | N0 | M0 |  | WT | MT |  |  | GSE39582 |
| GSM972071 | GPL570 | 68 | F | Left | II |  | 0 | 183 | T3 | N0 | M0 |  | WT | WT |  |  | GSE39582 |
| GSM972072 | GPL570 | 70 | F | Right | II |  | 0 | 172 | T4 | N0 | M0 |  | MT | WT |  |  | GSE39582 |
| GSM972073 | GPL570 | 80 | F | Right | II |  | 0 | 163 | T3 | N0 | M0 |  | WT | MT |  |  | GSE39582 |
| GSM972074 | GPL570 | 70 | F | Left | II |  | 1 | 75 | T4 | N0 | M0 |  | WT | WT |  |  | GSE39582 |
| GSM972075 | GPL570 | 42 | M | Left | II |  | 1 | 44 | T4 | N0 | M0 |  | WT | WT |  |  | GSE39582 |
| GSM972076 | GPL570 | 48 | M | Right | II |  | 0 | 153 | T3 | N0 | M0 |  | WT | WT |  |  | GSE39582 |
| GSM972077 | GPL570 | 58 | F | Left | II |  | 1 | 31 | T3 | N0 | M0 |  | WT | MT |  |  | GSE39582 |
| GSM972078 | GPL570 | 63 | M | Left | II |  | 1 | 145 | T3 | N0 | M0 |  | WT | WT |  |  | GSE39582 |
| GSM972079 | GPL570 | 44 | M | Left | II |  | 0 | 168 | T3 | N0 | M0 |  | WT | WT |  |  | GSE39582 |
| GSM972080 | GPL570 | 61 | M | Left | II |  | 0 | 165 | T4 | N0 | M0 |  | WT | MT |  |  | GSE39582 |
| GSM972081 | GPL570 | 68 | F | Left | II |  | 0 | 26 | T3 | N0 | M0 |  | WT | MT |  |  | GSE39582 |
| GSM972082 | GPL570 | 75 | M | Left | II |  | 1 | 132 | T3 | N0 | M0 |  | WT | MT |  |  | GSE39582 |
| GSM972083 | GPL570 | 65 | F | Left | II |  | 0 | 127 | T3 | N0 | M0 |  | WT | WT |  |  | GSE39582 |
| GSM972084 | GPL570 | 73 | F | Left | II |  | 0 | 129 | T3 | N0 | M0 |  | WT | WT |  |  | GSE39582 |
| GSM972085 | GPL570 | 56 | M | Right | II |  | 0 | 97 | T3 | N0 | M0 |  | WT | WT |  |  | GSE39582 |
| GSM972086 | GPL570 | 81 | M | Left | II |  | 1 | 43 | T3 | N0 | M0 |  | WT | WT |  |  | GSE39582 |
| GSM972087 | GPL570 | 84 | F | Right | II |  | 1 | 32 | T3 | N0 | M0 |  | WT | WT |  |  | GSE39582 |
| GSM972088 | GPL570 | 73 | F | Left | II |  | 0 | 79 | T4 | N0 | M0 |  | WT | WT |  |  | GSE39582 |
| GSM972089 | GPL570 | 68 | F | Right | II |  | 0 | 87 | T3 | N0 | M0 |  | WT | WT |  |  | GSE39582 |
| GSM972090 | GPL570 | 72 | F | Left | II |  | 0 | 69 | T3 | N0 | M0 |  | WT | WT |  |  | GSE39582 |
| GSM972091 | GPL570 | 67 | M | Left | II |  | 0 | 70 | T3 | N0 | M0 |  | WT | MT |  |  | GSE39582 |
| GSM972092 | GPL570 | 76 | F | Left | II |  | 0 | 47 | T3 | N0 | M0 |  | WT | MT |  |  | GSE39582 |
| GSM972093 | GPL570 | 55 | F | Left | II |  | 0 | 74 | T4 | N0 | M0 |  | WT | WT |  |  | GSE39582 |
| GSM972094 | GPL570 | 67 | F | Right | II |  | 0 | 61 | T3 | N0 | M0 |  | WT | MT |  |  | GSE39582 |
| GSM972095 | GPL570 | 50 | M | Left | II |  | 0 | 67 | T3 | N0 | M0 |  | WT | MT |  |  | GSE39582 |
| GSM972096 | GPL570 | 63 | F | Left | III |  | 0 | 15 | T2 | N1 | M0 |  | WT | WT |  |  | GSE39582 |
| GSM972097 | GPL570 | 64 | M | Right | III |  | 1 | 12 | T4 | N1 | M0 |  | WT | MT |  |  | GSE39582 |
| GSM972098 | GPL570 | 66 | M | Left | III |  | 1 | 15 | T4 | N2 | M0 |  | WT | MT |  |  | GSE39582 |
| GSM972099 | GPL570 | 78 | M | Left | III |  | 0 | 15 | T3 | N1 | M0 |  | WT | WT |  |  | GSE39582 |
| GSM972100 | GPL570 | 71 | F | Right | III |  | 0 | 25 | T4 | N2 | M0 |  | WT | MT |  |  | GSE39582 |
| GSM972101 | GPL570 | 56 | M | Left | III |  | 0 | 35 | T3 | N1 | M0 |  |  |  |  |  | GSE39582 |
| GSM972102 | GPL570 | 22 | M | Left | III |  | 0 | 46 | T3 | N1 | M0 |  |  |  |  |  | GSE39582 |
| GSM972103 | GPL570 | 66 | M | Left | III |  | 0 | 58 | T3 | N2 | M0 |  | WT | MT |  |  | GSE39582 |
| GSM972104 | GPL570 | 72 | F | Right | III |  | 0 | 41 | T3 | N3 | M0 |  | WT | MT |  |  | GSE39582 |
| GSM972105 | GPL570 | 53 | M | Left | III |  | 0 | 32 | T2 | N3 | M0 |  | WT | WT |  |  | GSE39582 |
| GSM972106 | GPL570 | 96 | F | Left | III |  | 0 | 72 | T3 | N1 | M0 |  |  |  |  |  | GSE39582 |
| GSM972107 | GPL570 | 76 | M | Left | III |  | 1 | 60 | T3 | N1 | M0 |  | WT | WT |  |  | GSE39582 |
| GSM972108 | GPL570 | 64 | M | Left | III |  | 0 | 103 | T4 | N1 | M0 |  |  |  |  |  | GSE39582 |
| GSM972109 | GPL570 | 96 | M | Right | III |  | 0 | 36 | T3 | N1 | M0 |  | WT | WT |  |  | GSE39582 |
| GSM972110 | GPL570 | 76 | M | Right | III |  | 1 | 7 | T4 | N2 | M0 |  |  |  |  |  | GSE39582 |
| GSM972111 | GPL570 | 63 | M | Left | III |  | 0 | 22 | T3 | N2 | M0 |  |  |  |  |  | GSE39582 |
| GSM972112 | GPL570 | 64 | F | Right | III |  | 1 | 32 | T3 | N2 | M0 |  |  |  |  |  | GSE39582 |
| GSM972113 | GPL570 | 63 | F | Right | III |  | 0 | 27 | T3 | N1 | M0 |  |  |  |  |  | GSE39582 |
| GSM972114 | GPL570 | 73 | M | Right | III |  | 0 | 46 | T3 | N1 | M0 |  | MT | WT |  |  | GSE39582 |
| GSM972115 | GPL570 | 59 | F | Left | III |  | 1 | 75 | T3 | N3 | M0 |  | WT | WT |  |  | GSE39582 |
| GSM972116 | GPL570 | 79 | F | Left | III |  | 1 | 29 | T3 | N2 | M0 |  | WT | WT |  |  | GSE39582 |
| GSM972117 | GPL570 | 78 | F | Right | III |  | 0 | 32 | T3 | N1 | M0 |  | MT | WT |  |  | GSE39582 |
| GSM972118 | GPL570 | 64 | M | Left | III |  | 0 | 30 | T3 | N2 | M0 |  | WT | MT |  |  | GSE39582 |
| GSM972119 | GPL570 | 96 | M | Left | III |  | 0 | 37 | T4 | N1 | M0 |  |  |  |  |  | GSE39582 |
| GSM972120 | GPL570 | 96 | F | Right | III |  | 0 | 36 | T3 | N1 | M0 |  |  |  |  |  | GSE39582 |
| GSM972121 | GPL570 | 96 | M | Left | III |  | 0 | 35 | T3 | N1 | M0 |  | WT | MT |  |  | GSE39582 |
| GSM972122 | GPL570 | 97 | F | Right | III |  | 1 | 19 | T4 | N1 | M0 |  |  |  |  |  | GSE39582 |
| GSM972123 | GPL570 | 53 | M | Right | II |  | 0 | 71 | T3 | N0 | M0 |  |  |  |  |  | GSE39582 |
| GSM972124 | GPL570 | 49 | F | Left | II |  | 0 | 75 | T3 | N0 | M0 |  | WT | WT |  |  | GSE39582 |
| GSM972125 | GPL570 | 64 | F | Left | II |  | 0 | 68 | T3 | N0 | M0 |  | WT | WT |  |  | GSE39582 |
| GSM972126 | GPL570 | 61 | M | Left | II |  | 0 | 63 | T3 | N0 | M0 |  |  |  |  |  | GSE39582 |
| GSM972127 | GPL570 | 66 | F | Left | II |  | 0 | 85 | T3 | N0 | M0 |  | WT | MT |  |  | GSE39582 |
| GSM972128 | GPL570 | 64 | M | Left | II |  | 0 | 93 | T3 | N0 | M0 |  | WT | WT |  |  | GSE39582 |
| GSM972129 | GPL570 | 76 | M | Left | II |  | 0 | 11 | T2 | N0 | M0 |  | WT | MT |  |  | GSE39582 |
| GSM972130 | GPL570 | 76 | M | Left | II |  | 0 | 55 | T4 | N0 | M0 |  | WT | WT |  |  | GSE39582 |
| GSM972131 | GPL570 | 78 | F | Right | II |  | 0 | 86 | T3 | N0 | M0 |  | WT | MT |  |  | GSE39582 |
| GSM972132 | GPL570 | 87 | F | Left | II |  | 1 | 61 | T3 | N0 | M0 |  | WT | MT |  |  | GSE39582 |
| GSM972133 | GPL570 | 64 | M | Left | III |  | 1 | 53 | T3 |  | M0 |  |  | WT | MT |  | GSE39582 |
| GSM972134 | GPL570 | 74 | M | Left | III |  | 1 | 14 | T3 | N2 | M0 |  |  | WT | MT |  | GSE39582 |
| GSM972135 | GPL570 | 78 | F | Left | II |  | 1 | 13 | T3 | N0 | M0 |  |  | MT | MT |  | GSE39582 |
| GSM972136 | GPL570 | 54 | M | Left | III |  | 0 | 130 | T3 | N1 | M0 |  | WT | WT | WT |  | GSE39582 |
| GSM972137 | GPL570 | 68 | M | Left | II |  | 0 | 129 | T3 | N0 | M0 |  |  | WT | MT |  | GSE39582 |
| GSM972138 | GPL570 | 77 | M | Left | II |  | 1 | 53 | T3 | N0 | M0 |  |  | WT | WT |  | GSE39582 |
| GSM972139 | GPL570 | 69 | F | Left | III |  | 0 | 102 | T3 | N1 | M0 |  |  | WT | MT |  | GSE39582 |
| GSM972140 | GPL570 | 64 | M | Left | II |  | 0 | 172 | T4 | N0 | M0 |  |  | MT | WT |  | GSE39582 |
| GSM972141 | GPL570 | 58 | M | Left | III |  | 0 | 84 | T3 | N2 | M0 |  |  | WT | MT |  | GSE39582 |
| GSM972142 | GPL570 | 86 | F | Right | III |  | 1 | 35 | T3 | N2 | M0 |  | WT | MT | MT |  | GSE39582 |
| GSM972143 | GPL570 | 57 | M | Left | II |  | 0 | 154 | T4 | N0 | M0 |  | WT | WT | WT |  | GSE39582 |
| GSM972144 | GPL570 | 63 | F | Left | II |  | 0 | 121 | T3 | N0 | M0 |  | WT | WT | MT |  | GSE39582 |
| GSM972145 | GPL570 | 63 | F | Left | III |  | 0 | 135 | T3 | N2 | M0 |  |  | WT | MT |  | GSE39582 |
| GSM972146 | GPL570 | 60 | M | Left | III |  | 0 | 66 | T3 | N2 | M0 |  |  | MT | MT |  | GSE39582 |
| GSM972147 | GPL570 | 79 | M | Left | II |  | 0 | 140 | T3 | N0 | M0 |  | WT | WT | MT |  | GSE39582 |
| GSM972148 | GPL570 | 59 | M | Left | III |  | 0 | 127 | T3 | N1 | M0 |  |  | MT | MT |  | GSE39582 |
| GSM972149 | GPL570 | 64 | M | Left | II |  | 0 | 132 | T3 | N0 | M0 |  |  | WT | WT |  | GSE39582 |
| GSM972150 | GPL570 | 55 | F | Left | III |  | 0 | 109 | T3 | N1 | M0 |  |  | WT | MT |  | GSE39582 |
| GSM972151 | GPL570 | 75 | F | Left | III |  | 0 | 77 | T3 | N1 | M0 |  |  | MT | WT |  | GSE39582 |
| GSM972152 | GPL570 | 70 | F | Right | III |  | 0 | 56 | T3 | N1 | M0 |  |  | MT | WT |  | GSE39582 |
| GSM972153 | GPL570 | 71 | M | Left | II |  | 1 | 66 | T3 | N0 | M0 |  | WT | WT | MT |  | GSE39582 |
| GSM972154 | GPL570 | 49 | F | Left | III |  | 1 | 44 | T4 | N2 | M0 |  |  | MT | MT |  | GSE39582 |
| GSM972155 | GPL570 | 42 | M | Left | III |  | 1 | 24 | T3 | N2 | M0 |  |  | MT | MT |  | GSE39582 |
| GSM972156 | GPL570 | 67 | M | Left | III |  | 1 | 112 | T3 | N1 | M0 |  |  | WT | WT |  | GSE39582 |
| GSM972157 | GPL570 | 57 | M | Left | III |  | 0 | 118 | T3 | N1 | M0 |  |  | WT | WT |  | GSE39582 |
| GSM972158 | GPL570 | 45 | F | Right | III |  | 0 | 120 | T3 | N2 | M0 |  |  | MT | MT |  | GSE39582 |
| GSM972159 | GPL570 | 67 | M | Right | III |  | 0 | 93 | T3 | N1 | M0 |  | WT | MT | WT |  | GSE39582 |
| GSM972160 | GPL570 | 73 | M | Left | II |  | 0 | 77 | T3 | N0 | M0 |  |  | WT | MT |  | GSE39582 |
| GSM972161 | GPL570 | 91 | F | Left | II |  | 1 | 11 | T3 | N0 | M0 |  |  | MT | WT |  | GSE39582 |
| GSM972162 | GPL570 | 73 | F | Left | III |  | 0 | 77 | T3 | N1 | M0 |  |  | WT | MT |  | GSE39582 |
| GSM972163 | GPL570 | 71 | M | Left | II |  | 0 | 41 | T4 | N0 | M0 |  |  | WT | MT |  | GSE39582 |
| GSM972164 | GPL570 | 70 | M | Left | III |  | 1 | 69 | T3 |  | M0 |  |  | WT | WT |  | GSE39582 |
| GSM972165 | GPL570 | 67 | M | Right | II |  | 1 | 87 | T4 | N0 | M0 |  |  | WT | MT |  | GSE39582 |
| GSM972166 | GPL570 | 42 | F | Left | III |  | 1 | 12 | T3 |  | M0 |  |  | MT | WT |  | GSE39582 |
| GSM972167 | GPL570 | 47 | M | Left | II |  | 1 | 45 | T3 | N0 | M0 |  | WT | WT | WT |  | GSE39582 |
| GSM972168 | GPL570 | 76 | M | Right | III |  | 1 | 8 | T4 |  | M0 |  |  | WT | WT |  | GSE39582 |
| GSM972169 | GPL570 | 50 | M | Left | II |  | 0 | 164 | T4 | N0 | M0 |  |  | WT | WT |  | GSE39582 |
| GSM972170 | GPL570 | 67 | F | Left | III |  | 0 | 73 | T2 | N2 | M0 |  |  | WT | WT |  | GSE39582 |
| GSM972171 | GPL570 | 70 | F | Right | III |  | 0 | 130 | T4 | N1 | M0 |  |  | WT | WT |  | GSE39582 |
| GSM972172 | GPL570 | 88 | F | Right | II |  | 1 | 5 | T4 | N0 | M0 |  | WT | MT | MT |  | GSE39582 |
| GSM972173 | GPL570 | 59 | F | Left | II |  | 1 | 26 | T4 | N0 | M0 |  | WT | MT | WT |  | GSE39582 |
| GSM972174 | GPL570 | 75 | M | Left | III |  | 0 | 97 | T3 | N1 | M0 |  | WT | WT | MT |  | GSE39582 |
| GSM972175 | GPL570 | 83 | F | Left | III |  | 1 | 43 | T3 | N1 | M0 |  | WT | MT | WT |  | GSE39582 |
| GSM972176 | GPL570 | 85 | F | Right | III |  | 1 | 36 | T4 | N2 | M0 |  | WT | WT | MT |  | GSE39582 |
| GSM972177 | GPL570 | 71 | M | Right | II |  | 1 | 22 |  |  |  |  | WT | MT | MT |  | GSE39582 |
| GSM972178 | GPL570 | 69 | F | Right | III |  | 0 | 67 |  |  |  |  | WT | MT | WT |  | GSE39582 |
| GSM972179 | GPL570 | 77 | M | Left | II |  | 1 | 18 |  |  |  |  | WT | WT | MT |  | GSE39582 |
| GSM972180 | GPL570 | 66 | F | Left | II |  | 1 | 24 |  |  |  |  | WT | WT | MT |  | GSE39582 |
| GSM972181 | GPL570 | 69 | M | Right | III |  | 1 | 34 |  |  |  |  | WT | MT | WT |  | GSE39582 |
| GSM972182 | GPL570 | 53 | M | Left | II |  | 1 | 58 | T4 | N0 | M0 |  | WT | WT | WT |  | GSE39582 |
| GSM972183 | GPL570 | 62 | F | Left | III |  | 1 | 32 |  |  |  |  | WT | MT | MT |  | GSE39582 |
| GSM972184 | GPL570 | 70 | F | Right | II |  | 1 | 39 |  |  |  |  | MT | WT | WT |  | GSE39582 |
| GSM972185 | GPL570 | 58 | F | Left | III |  | 0 | 39 |  |  |  |  | WT | WT | MT |  | GSE39582 |
| GSM972186 | GPL570 | 50 | F | Right | III |  | 1 | 47 |  |  |  |  | WT | MT | WT |  | GSE39582 |
| GSM972187 | GPL570 | 62 | M | Right | II |  | 0 | 49 | T3 | N0 | M0 |  | WT | WT | MT |  | GSE39582 |
| GSM972188 | GPL570 | 58 | F | Left | III |  | 0 | 22 | T3 | N2 | M0 |  | WT | MT | WT |  | GSE39582 |
| GSM972189 | GPL570 | 63 | M | Right | III |  | 0 | 192 | T4 |  | M0 |  | WT | WT | MT |  | GSE39582 |
| GSM972190 | GPL570 | 68 | M | Left | II |  | 0 | 108 | T3 | N0 | M0 |  | WT | WT | MT |  | GSE39582 |
| GSM972191 | GPL570 | 49 | M | Left | III |  | 0 | 122 | T3 | N1 | M0 |  | WT | MT | WT |  | GSE39582 |
| GSM972192 | GPL570 | 72 | F | Right | II |  | 0 | 158 | T3 | N0 | M0 |  | WT | MT | MT |  | GSE39582 |
| GSM972193 | GPL570 | 51 | F | Left | III |  | 0 | 73 | T3 | N1 | M0 |  | WT | MT | MT |  | GSE39582 |
| GSM972194 | GPL570 | 43 | M | Left | III |  | 0 | 83 | T3 | N2 | M0 |  | WT | WT | MT |  | GSE39582 |
| GSM972195 | GPL570 | 54 | F | Right | II |  | 0 | 120 | T3 | N0 | M0 |  | WT | MT | WT |  | GSE39582 |
| GSM972196 | GPL570 | 69 | F | Right | II |  | 0 | 73 | T3 | N0 | M0 |  | WT | MT | WT |  | GSE39582 |
| GSM972197 | GPL570 | 78 | F | Right | II |  | 0 | 50 | T3 | N0 | M0 |  | MT | WT | WT |  | GSE39582 |
| GSM972198 | GPL570 | 52 | F | Left | III |  | 0 | 57 | T3 | N1 | M0 |  | WT | MT | MT |  | GSE39582 |
| GSM972199 | GPL570 | 73 | M | Left | III |  | 0 | 66 | T3 | N2 | M0 |  | WT | WT | MT |  | GSE39582 |
| GSM972200 | GPL570 | 61 | M | Left | II |  | 0 | 54 | T3 | N0 | M0 |  | WT | WT | WT |  | GSE39582 |
| GSM972201 | GPL570 | 78 | M | Right | III |  | 0 | 67 | T3 | N2 | M0 |  | WT | WT | WT |  | GSE39582 |
| GSM972202 | GPL570 | 57 | F | Left | III |  | 0 | 53 | T3 | N1 | M0 |  | WT | WT | MT |  | GSE39582 |
| GSM972203 | GPL570 | 66 | F | Left | III |  | 0 | 54 | T3 | N2 | M0 |  | WT | WT | MT |  | GSE39582 |
| GSM972204 | GPL570 | 78 | M | Left | II |  | 0 | 44 |  |  |  |  | WT | WT | MT |  | GSE39582 |
| GSM972205 | GPL570 | 76 | M | Left | II |  | 1 | 35 |  |  |  |  | WT | WT | WT |  | GSE39582 |
| GSM972206 | GPL570 | 74 | M | Left | II |  | 0 | 42 |  |  |  |  | WT | MT | WT |  | GSE39582 |
| GSM972207 | GPL570 | 65 | M | Left | III |  | 0 | 82 | T3 | N1 | M0 |  | WT | WT | MT |  | GSE39582 |
| GSM972208 | GPL570 | 63 | M | Left | IV |  | 1 | 25 | T4 | N2 | M1 |  | WT | WT | MT |  | GSE39582 |
| GSM972209 | GPL570 | 54 | M | Right | IV |  | 1 | 13 | T3 | N2 | M1 |  | MT | WT | MT |  | GSE39582 |
| GSM972210 | GPL570 | 50 | M | Left | IV |  | 1 | 46 | T3 |  | M1 |  | WT | WT | MT |  | GSE39582 |
| GSM972211 | GPL570 | 65 | M | Left | III |  | 0 | 57 | T3 | N1 | M0 |  | WT | WT | MT |  | GSE39582 |
| GSM972212 | GPL570 | 54 | F | Left | IV |  | 1 | 18 | T3 | N1 | M1 |  | WT | MT | MT |  | GSE39582 |
| GSM972213 | GPL570 | 71 | F | Left | IV |  | 1 | 1 | T3 | N0 | M1 |  | WT | MT | MT |  | GSE39582 |
| GSM972214 | GPL570 | 88 | F | Right | IV |  | 1 | 2 | T3 | N2 | M1 |  | MT | WT | MT |  | GSE39582 |
| GSM972215 | GPL570 | 73 | F | Right | III |  | 0 | 47 | T4 | N2 | M0 |  | WT | MT | MT |  | GSE39582 |
| GSM972216 | GPL570 | 45 | F | Left | IV |  | 0 | 94 | T3 | N2 | M1 |  | WT | WT | MT |  | GSE39582 |
| GSM972217 | GPL570 | 73 | M | Left | IV |  | 0 | 70 | T3 | N1 | M1 |  | WT | MT | MT |  | GSE39582 |
| GSM972218 | GPL570 | 75 | F | Right | IV |  | 1 | 7 | T4 | N3 | M1 |  | WT | MT | WT |  | GSE39582 |
| GSM972219 | GPL570 | 60 | M | Left | IV |  | 0 | 53 | T3 | N2 | M1 |  | WT | MT | MT |  | GSE39582 |
| GSM972220 | GPL570 | 81 | M | Right | III |  | 0 | 1 | T3 | N1 | M0 |  | MT | WT |  |  | GSE39582 |
| GSM972221 | GPL570 | 75 | F | Right | II |  | 0 | 65 | T3 | N0 | M0 |  | MT | WT |  |  | GSE39582 |
| GSM972222 | GPL570 | 69 | F | Right | II |  | 0 | 57 | T3 | N0 | M0 |  | WT | WT |  |  | GSE39582 |
| GSM972223 | GPL570 | 78 | M | Right | II |  | 1 | 33 | T3 | N0 | M0 |  | MT | WT |  |  | GSE39582 |
| GSM972224 | GPL570 | 74 | M | Right | III |  | 1 | 25 | T4 | N2 | M0 |  |  |  |  |  | GSE39582 |
| GSM972225 | GPL570 | 51 | M | Left | II |  | 0 | 37 | T3 | N0 | M0 |  | WT | WT |  |  | GSE39582 |
| GSM972226 | GPL570 | 57 | M | Right | II |  | 0 | 20 | T4 | N0 | M0 |  | WT | MT |  |  | GSE39582 |
| GSM972227 | GPL570 | 61 | M | Right | IV |  | 1 | 20 | T3 | N2 | M1 |  | WT | MT |  |  | GSE39582 |
| GSM972228 | GPL570 | 68 | M | Right | II |  | 0 | 1 | T3 | N0 | M0 |  | MT | WT |  |  | GSE39582 |
| GSM972230 | GPL570 | 55 | M | Left | III |  | 0 | 27 | T3 | N1 | M0 |  | WT | WT |  |  | GSE39582 |
| GSM972231 | GPL570 | 54 | M | Left | IV |  | 0 | 14 | T3 | N1 | M1 |  | WT | WT |  |  | GSE39582 |
| GSM972232 | GPL570 | 69 | M | Left | IV |  | 0 | 21 | T4 | N2 | M1 |  | WT | MT |  |  | GSE39582 |
| GSM972233 | GPL570 | 67 | M | Left | II |  | 0 | 15 | T3 | N0 | M0 |  | WT | WT |  |  | GSE39582 |
| GSM972234 | GPL570 | 79 | M | Right | IV |  | 1 | 10 | T3 | N1 | M1 |  | WT | WT |  |  | GSE39582 |
| GSM972235 | GPL570 | 57 | F | Left | III |  | 0 | 7 | T2 | N1 | M0 |  | WT | MT |  |  | GSE39582 |
| GSM972236 | GPL570 | 71 | M | Left | IV |  | 0 | 12 | T1 | N0 | M1 |  | WT | WT |  |  | GSE39582 |
| GSM972237 | GPL570 | 55 | F | Left | I |  | 0 | 25 | T1 | N0 | M0 |  | WT | WT |  |  | GSE39582 |
| GSM972238 | GPL570 | 53 | F | Left | III |  | 0 | 19 | T2 | N1 | M0 |  | WT | WT |  |  | GSE39582 |
| GSM972239 | GPL570 | 59 | M | Left | II |  | 0 | 14 | T3 | N0 | M0 |  | WT | WT |  |  | GSE39582 |
| GSM972240 | GPL570 | 67 | F | Left | IV |  | 0 | 14 | T3 | N1 | M1 |  | WT | WT |  |  | GSE39582 |
| GSM972241 | GPL570 | 61 | M | Left | II |  | 1 | 17 | T3 | N0 | M0 |  | WT | WT |  |  | GSE39582 |
| GSM972242 | GPL570 | 69 | M | Right | I |  | 0 | 17 | T2 | N0 | M0 |  | WT | MT |  |  | GSE39582 |
| GSM972243 | GPL570 | 66 | M | Left | II |  | 0 | 2 | T3 | N0 | M0 |  | WT | MT |  |  | GSE39582 |
| GSM972244 | GPL570 | 51 | F | Left | I |  | 0 | 14 | T1 | N0 | M0 |  | WT | WT |  |  | GSE39582 |
| GSM972247 | GPL570 | 79 | M | Left | II |  | 0 | 6 | T4 | N0 | M0 |  | WT | WT |  |  | GSE39582 |
| GSM972248 | GPL570 | 58 | M | Right | II |  | 0 | 14 | T3 | N0 | M0 |  |  |  |  |  | GSE39582 |
| GSM972249 | GPL570 | 74 | F | Right | I |  | 0 | 14 | T1 | N0 | M0 |  | WT | MT |  |  | GSE39582 |
| GSM972250 | GPL570 | 52 | M | Left | III |  | 0 | 12 | T3 | N1 | M0 |  | WT | MT |  |  | GSE39582 |
| GSM972251 | GPL570 | 57 | M | Left | IV |  | 1 | 7 | T4 | N1 | M1 |  | WT | MT |  |  | GSE39582 |
| GSM972252 | GPL570 | 37 | F | Right | IV |  | 0 | 16 | T3 | N1 | M1 |  | WT | MT |  |  | GSE39582 |
| GSM972253 | GPL570 | 56 | F | Right | IV |  | 0 | 16 | T3 | N2 | M1 |  | WT | WT |  |  | GSE39582 |
| GSM972254 | GPL570 | 77 | F | Left | IV |  | 0 | 14 | T3 | N0 | M1 |  | WT | WT |  |  | GSE39582 |
| GSM972255 | GPL570 | 81 | F | Right | II |  | 0 | 5 | T3 | N0 | M0 |  | WT | WT |  |  | GSE39582 |
| GSM972256 | GPL570 | 63 | F | Left | IV |  | 0 | 19 | T4 | N1 | M1 |  | WT | WT |  |  | GSE39582 |
| GSM972257 | GPL570 | 88 | F | Left | II |  | 1 | 21 | T4 | N0 | M0 |  | WT | MT |  |  | GSE39582 |
| GSM972259 | GPL570 | 72 | F | Left | II |  | 0 | 29 | T4 | N0 | M0 |  | WT | MT |  |  | GSE39582 |
| GSM972260 | GPL570 | 70 | M | Left | IV |  | 0 | 13 | T3 | N2 | M1 |  | WT | MT |  |  | GSE39582 |
| GSM972261 | GPL570 | 79 | F | Right | III |  | 1 | 7 | T4 | N1 | M0 |  | MT | WT |  |  | GSE39582 |
| GSM972262 | GPL570 | 88 | F | Left | II |  | 0 | 5 | T4 | N0 |  |  | MT | WT |  |  | GSE39582 |
| GSM972263 | GPL570 | 32 | M | Left | III |  | 0 | 76 | T2 | N1 | M0 |  | WT | WT |  |  | GSE39582 |
| GSM972264 | GPL570 | 46 | M | Right | II |  | 0 | 73 | T3 | N0 | M0 |  | WT | WT |  |  | GSE39582 |
| GSM972265 | GPL570 | 78 | F | Right | III |  | 0 | 60 | T3 | N1 | M0 |  | MT | WT |  |  | GSE39582 |
| GSM972266 | GPL570 | 56 | M | Left | IV |  | 1 | 20 | T4 | N2 | M1 |  | WT | WT |  |  | GSE39582 |
| GSM972267 | GPL570 | 82 | M | Left | II |  | 1 | 67 | T3 | N0 | M0 |  | WT | WT |  |  | GSE39582 |
| GSM972268 | GPL570 | 67 | M | Left | III |  | 0 | 48 | T2 | N1 | M0 |  | WT | MT |  |  | GSE39582 |
| GSM972269 | GPL570 | 70 | M | Right | I |  | 0 | 79 | T2 | N0 | M0 |  | WT | MT |  |  | GSE39582 |
| GSM972270 | GPL570 | 75 | F | Right | II |  | 0 | 65 | T4 | N0 | M0 |  | MT | WT |  |  | GSE39582 |
| GSM972271 | GPL570 | 92 | M | Right | III |  | 1 | 14 | T4 | N1 | M0 |  | WT | MT |  |  | GSE39582 |
| GSM972272 | GPL570 | 47 | F | Right | IV |  | 1 | 15 | T3 | N1 | M1 |  | WT | MT |  |  | GSE39582 |
| GSM972274 | GPL570 | 91 | F | Right | III |  | 0 | 57 | T4 | N2 | M0 |  | MT | WT |  |  | GSE39582 |
| GSM972275 | GPL570 | 76 | M | Right | II |  | 1 | 4 | T4 | N0 | M0 |  | MT | WT |  |  | GSE39582 |
| GSM972276 | GPL570 | 59 | M | Right | III |  | 0 | 43 | T3 | N2 | M0 |  | WT | MT |  |  | GSE39582 |
| GSM972277 | GPL570 | 88 | F | Right | II |  | 0 | 51 | T4 | N0 | M0 |  | MT | WT |  |  | GSE39582 |
| GSM972278 | GPL570 | 72 | F | Right | I |  | 0 | 45 | T2 | N0 | M0 |  | MT | WT |  |  | GSE39582 |
| GSM972279 | GPL570 | 67 | F | Right | III |  | 0 | 52 | T3 | N1 | M0 |  | MT | WT |  |  | GSE39582 |
| GSM972280 | GPL570 | 79 | F | Right | II |  | 1 | 46 | T4 | N0 | M0 |  | WT | MT |  |  | GSE39582 |
| GSM972281 | GPL570 | 64 | M | Left | I |  | 0 | 56 | T1 | N0 | M0 |  | WT | WT |  |  | GSE39582 |
| GSM972282 | GPL570 | 79 | F | Left | I |  | 0 | 51 | T2 | N0 | M0 |  | WT | MT |  |  | GSE39582 |
| GSM972283 | GPL570 | 65 | M | Right | II |  | 0 | 51 | T3 | N0 | M0 |  | WT | WT |  |  | GSE39582 |
| GSM972284 | GPL570 | 63 | F | Left | IV |  | 1 | 27 | T4 | N2 | M1 |  | WT | MT |  |  | GSE39582 |
| GSM972285 | GPL570 | 71 | M | Left | II |  | 1 | 2 | T2 | N0 | M0 |  | WT | WT |  |  | GSE39582 |
| GSM972286 | GPL570 | 24 | M | Right | II |  | 0 | 37 | T3 | N0 | M0 |  | WT | MT |  |  | GSE39582 |
| GSM972287 | GPL570 | 77 | M | Right | II |  | 0 | 43 | T3 | N0 | M0 |  | WT | WT |  |  | GSE39582 |
| GSM972288 | GPL570 | 53 | M | Left | IV |  | 1 | 35 | T4 | N1 | M1 |  | WT | WT |  |  | GSE39582 |
| GSM972289 | GPL570 | 72 | M | Right | IV |  | 1 | 17 | T4 | N1 | M1 |  | WT | MT |  |  | GSE39582 |
| GSM972290 | GPL570 | 70 | F | Left | I |  | 0 | 39 | T2 | N0 | M0 |  | WT | WT |  |  | GSE39582 |
| GSM972291 | GPL570 | 46 | M | Left | III |  | 0 | 32 | T4 | N2 | M0 |  | WT | MT |  |  | GSE39582 |
| GSM972292 | GPL570 | 62 | F | Right | II |  | 0 | 25 | T3 | N0 | M0 |  | MT | WT |  |  | GSE39582 |
| GSM972293 | GPL570 |  | M | Right | I |  | 0 | 50 | T2 | N0 | M0 |  | WT | MT |  |  | GSE39582 |
| GSM972294 | GPL570 | 74 | M | Left | II |  | 0 | 25 | T3 | N0 | M0 |  | MT | WT |  |  | GSE39582 |
| GSM972295 | GPL570 | 68 | M | Right | III |  | 0 | 61 | T4 | N1 | M0 |  | WT | MT |  |  | GSE39582 |
| GSM972297 | GPL570 | 77 | M | Right | I |  | 1 | 46 | T1 | N0 | M0 |  | WT | MT |  |  | GSE39582 |
| GSM972298 | GPL570 | 83 | F | Right | II |  | 0 | 9 | T3 | N0 | M0 |  |  |  |  |  | GSE39582 |
| GSM972299 | GPL570 | 54 | F | Left | IV |  | 1 | 41 | T4 | N2 | M1 |  | WT | WT |  |  | GSE39582 |
| GSM972301 | GPL570 | 74 | M | Left | III |  | 1 | 105 | T3 | N2 | M0 |  | WT | WT | MT |  | GSE39582 |
| GSM972302 | GPL570 | 79 | M | Right | III |  | 1 | 27 | T4 | N1 | M0 |  | WT | MT | WT |  | GSE39582 |
| GSM972303 | GPL570 | 80 | F | Left | I |  | 0 | 19 | T2 | N0 | M0 |  | WT | WT | MT |  | GSE39582 |
| GSM972304 | GPL570 | 60 | F | Left | II |  | 0 | 30 | T3 | N0 | M0 |  | WT | MT | WT |  | GSE39582 |
| GSM972305 | GPL570 | 82 | F | Right | III |  | 0 | 31 | T4 | N2 | M0 |  | MT | WT | WT |  | GSE39582 |
| GSM972306 | GPL570 | 70 | M | Left | II |  | 0 | 56 | T3 | N0 | M0 |  | WT | WT | MT |  | GSE39582 |
| GSM972307 | GPL570 | 71 | F | Right | II |  | 0 | 82 | T3 | N0 | M0 |  | WT | WT | WT |  | GSE39582 |
| GSM972308 | GPL570 | 79 | F | Right | III |  | 0 | 92 | T3 | N1 | M0 |  | WT | WT | WT |  | GSE39582 |
| GSM972309 | GPL570 | 78 | M | Right | II |  | 0 | 95 | T3 | N0 | M0 |  | WT | WT | WT |  | GSE39582 |
| GSM972310 | GPL570 | 80 | F | Right | III |  | 0 | 25 | T3 | N1 | M0 |  | WT | MT | MT |  | GSE39582 |
| GSM972311 | GPL570 | 55 | M | Left | II |  | 0 | 106 | T3 | N0 | M0 |  | WT | WT | WT |  | GSE39582 |
| GSM972312 | GPL570 | 71 | M | Left | II |  | 1 | 97 | T3 | N0 | M0 |  | WT | WT | MT |  | GSE39582 |
| GSM972313 | GPL570 | 83 | F | Left | I |  | 1 | 91 | T2 | N0 | M0 |  | WT | WT | MT |  | GSE39582 |
| GSM972314 | GPL570 | 86 | F | Right | III |  | 0 | 46 | T3 | N1 | M0 |  | MT | WT | WT |  | GSE39582 |
| GSM972315 | GPL570 | 60 | F | Left | I |  | 0 | 84 | T1 | N0 | M0 |  | WT | MT | WT |  | GSE39582 |
| GSM972316 | GPL570 | 77 | F | Right | II |  | 0 | 83 | T3 | N0 | M0 |  | MT | WT | WT |  | GSE39582 |
| GSM972317 | GPL570 | 85 | M | Right | II |  | 1 | 30 | T3 | N0 | M0 |  | MT | WT | WT |  | GSE39582 |
| GSM972318 | GPL570 | 84 | F | Right | II |  | 1 | 36 | T3 | N0 | M0 |  | WT | MT | WT |  | GSE39582 |
| GSM972319 | GPL570 | 71 | F | Left | II |  | 1 | 78 | T3 | N0 | M0 |  | WT | MT | MT |  | GSE39582 |
| GSM972320 | GPL570 | 64 | M | Left | III |  | 1 | 58 | T2 | N1 | M0 |  | WT | MT | MT |  | GSE39582 |
| GSM972321 | GPL570 | 52 | M | Left | III |  | 0 | 9 | T3 | N2 | M0 |  | WT | WT | MT |  | GSE39582 |
| GSM972322 | GPL570 | 46 | M | Left | II |  | 1 | 86 | T3 | N0 | M0 |  | WT | MT | WT |  | GSE39582 |
| GSM972323 | GPL570 | 67 | F | Left | III |  | 0 | 80 | T3 | N1 | M0 |  | WT | WT | MT |  | GSE39582 |
| GSM972324 | GPL570 | 72 | M | Left | II |  | 0 | 82 | T3 | N0 | M0 |  | WT | MT | WT |  | GSE39582 |
| GSM972325 | GPL570 | 55 | M | Right | III |  | 0 | 71 | T3 | N1 | M0 |  | WT | MT | WT |  | GSE39582 |
| GSM972326 | GPL570 | 71 | F | Left | II |  | 0 | 85 | T3 | N0 | M0 |  | WT | MT | MT |  | GSE39582 |
| GSM972327 | GPL570 | 60 | M | Right | II |  | 0 | 83 | T3 | N0 | M0 |  | WT | WT | WT |  | GSE39582 |
| GSM972328 | GPL570 | 74 | M | Left | III |  | 0 | 82 | T3 | N2 | M0 |  | WT | WT | WT |  | GSE39582 |
| GSM972329 | GPL570 | 61 | M | Left | II |  | 0 | 78 | T3 | N0 | M0 |  | WT | WT | WT |  | GSE39582 |
| GSM972330 | GPL570 | 79 | F | Right | II |  | 0 | 86 | T3 | N0 | M0 |  | WT | MT | WT |  | GSE39582 |
| GSM972331 | GPL570 | 79 | M | Left | II |  | 1 | 75 | T3 | N0 | M0 |  | WT | WT | WT |  | GSE39582 |
| GSM972332 | GPL570 | 72 | F | Left | II |  | 0 | 87 | T3 | N0 | M0 |  | MT | WT | MT |  | GSE39582 |
| GSM972333 | GPL570 | 49 | M | Left | II |  | 0 | 80 | T3 | N0 | M0 |  | WT | WT | MT |  | GSE39582 |
| GSM972334 | GPL570 | 79 | F | Right | III |  | 0 | 77 | T3 | N2 | M0 |  | MT | WT | WT |  | GSE39582 |
| GSM972335 | GPL570 | 73 | M | Left | I |  | 1 | 46 | T2 | N0 | M0 |  | WT | WT | MT |  | GSE39582 |
| GSM972336 | GPL570 | 63 | M | Left | III |  | 0 | 50 | T3 | N1 | M0 |  | WT | WT | MT |  | GSE39582 |
| GSM972337 | GPL570 | 80 | F | Right | III |  | 1 | 41 | T3 | N1 | M0 |  | MT | WT | WT |  | GSE39582 |
| GSM972338 | GPL570 | 69 | M | Left | II |  | 0 | 74 | T3 | N0 | M0 |  | WT | WT | MT |  | GSE39582 |
| GSM972339 | GPL570 | 67 | M | Right | III |  | 0 | 76 | T3 | N1 | M0 |  | WT | MT | MT |  | GSE39582 |
| GSM972340 | GPL570 | 75 | M | Left | II |  | 0 | 84 | T3 | N0 | M0 |  | WT | WT | WT |  | GSE39582 |
| GSM972341 | GPL570 | 89 | F | Left | III |  | 0 | 69 | T3 | N1 | M0 |  | WT | WT | MT |  | GSE39582 |
| GSM972342 | GPL570 | 78 | M | Left | I |  | 0 | 28 | T2 | N0 | M0 |  | WT | WT | WT |  | GSE39582 |
| GSM972343 | GPL570 | 86 | M | Right | II |  | 1 | 52 | T3 | N0 | M0 |  | WT | MT | MT |  | GSE39582 |
| GSM972344 | GPL570 | 70 | F | Left | II |  | 0 | 75 | T3 | N0 | M0 |  | WT | WT | MT |  | GSE39582 |
| GSM972345 | GPL570 | 83 | M | Right | III |  | 1 | 42 | T3 | N2 | M0 |  | WT | MT | WT |  | GSE39582 |
| GSM972346 | GPL570 | 82 | F | Left | III |  | 1 | 72 | T3 | N1 | M0 |  | MT | WT | MT |  | GSE39582 |
| GSM972347 | GPL570 | 73 | F | Left | II |  | 0 | 7 | T3 | N0 | M0 |  | WT | WT | MT |  | GSE39582 |
| GSM972348 | GPL570 | 60 | M | Left | II |  | 0 | 62 | T3 | N0 | M0 |  | WT | MT | WT |  | GSE39582 |
| GSM972349 | GPL570 | 79 | F | Right | III |  | 1 | 5 | T4 | N1 | M0 |  | WT | MT | WT |  | GSE39582 |
| GSM972350 | GPL570 | 84 | F | Left | III |  | 1 | 9 | T3 | N1 | M0 |  | WT | WT | WT |  | GSE39582 |
| GSM972351 | GPL570 | 71 | M | Left | II |  | 0 | 24 | T4 | N0 | M0 |  | WT | WT |  |  | GSE39582 |
| GSM972352 | GPL570 | 66 | M | Left | III |  | 0 | 139 | T3 | N2 | M0 |  | WT | WT | MT |  | GSE39582 |
| GSM972353 | GPL570 | 46 | F | Right | II |  | 0 | 133 | T4 | N0 | M0 |  | WT | MT | WT |  | GSE39582 |
| GSM972354 | GPL570 | 68 | F | Right | III |  | 1 | 95 | T3 | N2 | M0 |  | WT | WT | MT |  | GSE39582 |
| GSM972355 | GPL570 | 72 | M | Left | II |  | 1 | 34 | T3 | N0 | M0 |  | WT | MT | MT |  | GSE39582 |
| GSM972356 | GPL570 | 73 | F | Left | II |  | 1 | 53 | T3 | N0 | M0 |  | WT | WT | MT |  | GSE39582 |
| GSM972357 | GPL570 | 88 | F | Left | II |  | 1 | 42 | T3 | N0 | M0 |  | WT | WT | WT |  | GSE39582 |
| GSM972358 | GPL570 | 53 | F | Left | II |  | 0 | 81 | T3 | N0 | M0 |  | WT | WT | MT |  | GSE39582 |
| GSM972359 | GPL570 | 56 | F | Right | II |  | 1 | 30 | T3 | N0 | M0 |  | WT | WT | WT |  | GSE39582 |
| GSM972360 | GPL570 | 54 | F | Left | III |  | 0 | 141 | T3 | N1 | M0 |  | WT | WT | MT |  | GSE39582 |
| GSM972361 | GPL570 | 72 | F | Left | III |  | 1 | 19 | T4 | N2 | M0 |  | WT | MT | MT |  | GSE39582 |
| GSM972362 | GPL570 | 50 | M | Right | III |  | 0 | 98 | T3 | N1 | M0 |  | WT | MT | MT |  | GSE39582 |
| GSM972363 | GPL570 | 68 | F | Left | III |  | 0 | 140 | T3 | N1 | M0 |  | WT | MT | MT |  | GSE39582 |
| GSM972364 | GPL570 | 71 | F | Right | III |  | 0 | 103 | T3 | N1 | M0 |  | WT | MT | MT |  | GSE39582 |
| GSM972365 | GPL570 | 59 | F | Right | III |  | 0 | 47 | T3 | N2 | M0 |  | WT | MT | MT |  | GSE39582 |
| GSM972366 | GPL570 | 50 | M | Right | III |  | 1 | 24 | T3 | N2 | M0 |  | WT | MT | WT |  | GSE39582 |
| GSM972367 | GPL570 | 72 | M | Left | III |  | 0 | 95 | T3 | N1 | M0 |  | WT | MT | MT |  | GSE39582 |
| GSM972368 | GPL570 | 70 | F | Left | III |  | 0 | 92 | T3 | N1 | M0 |  | WT | WT | MT |  | GSE39582 |
| GSM972369 | GPL570 | 58 | M | Left | III |  | 1 | 102 | T3 | N2 | M0 |  | WT | WT | MT |  | GSE39582 |
| GSM972370 | GPL570 | 73 | F | Left | III |  | 1 | 71 | T3 | N1 | M0 |  | WT | WT | MT |  | GSE39582 |
| GSM972371 | GPL570 | 47 | M | Right | III |  | 0 | 81 | T3 | N1 | M0 |  | WT | WT | MT |  | GSE39582 |
| GSM972372 | GPL570 | 59 | M | Right | III |  | 1 | 50 | T4 | N2 | M0 |  | WT | MT | MT |  | GSE39582 |
| GSM972373 | GPL570 | 66 | M | Right | III |  | 0 | 79 | T3 | N1 | M0 |  | WT | WT | MT |  | GSE39582 |
| GSM972374 | GPL570 | 65 | M | Left | III |  | 0 | 90 | T1 | N1 | M0 |  | WT | WT | WT |  | GSE39582 |
| GSM972375 | GPL570 | 46 | F | Right | III |  | 0 | 117 | T3 | N1 | M0 |  | WT | MT | WT |  | GSE39582 |
| GSM972376 | GPL570 | 73 | F | Left | III |  | 0 | 87 | T3 | N2 | M0 |  | WT | WT | MT |  | GSE39582 |
| GSM972377 | GPL570 | 59 | F | Left | III |  | 0 | 82 | T3 | N1 | M0 |  | WT | WT | WT |  | GSE39582 |
| GSM972378 | GPL570 | 78 | M | Right | III |  | 0 | 86 | T3 | N2 | M0 |  | WT | WT | WT |  | GSE39582 |
| GSM972379 | GPL570 | 63 | F | Left | III |  | 0 | 95 | T2 | N1 | M0 |  | WT | MT | MT |  | GSE39582 |
| GSM972380 | GPL570 | 64 | F | Right | III |  | 1 | 15 | T3 | N2 | M0 |  | WT | MT | MT |  | GSE39582 |
| GSM972381 | GPL570 | 63 | M | Left | II |  | 1 | 48 | T3 | N0 | M0 |  | WT | WT | MT |  | GSE39582 |
| GSM972382 | GPL570 | 58 | M | Right | II |  | 1 | 38 | T3 | N0 | M0 |  | WT | MT | MT |  | GSE39582 |
| GSM972383 | GPL570 | 70 | F | Left | II |  | 0 | 92 | T3 | N0 | M0 |  | WT | WT | MT |  | GSE39582 |
| GSM972384 | GPL570 | 61 | M | Left | II |  | 1 | 106 | T3 | N0 | M0 |  | WT | WT | MT |  | GSE39582 |
| GSM972385 | GPL570 | 70 | M | Left | II |  | 0 | 63 | T3 | N0 | M0 |  | WT | WT | MT |  | GSE39582 |
| GSM972386 | GPL570 | 77 | F | Right | II |  | 0 | 90 | T3 | N0 | M0 |  | WT | MT | MT |  | GSE39582 |
| GSM972387 | GPL570 | 62 | M | Left | II |  | 0 | 123 | T3 | N0 | M0 |  | WT | WT | MT |  | GSE39582 |
| GSM972388 | GPL570 | 75 | F | Left | II |  | 1 | 83 | T3 | N0 | M0 |  | WT | WT | MT |  | GSE39582 |
| GSM972389 | GPL570 | 77 | M | Right | II |  | 0 | 93 | T4 | N0 | M0 |  | WT | MT | WT |  | GSE39582 |
| GSM972390 | GPL570 | 87 | M | Right | III |  | 1 | 8 | T3 | N1 | M0 |  | WT | MT | MT |  | GSE39582 |
| GSM972391 | GPL570 | 68 | M | Right | II |  | 1 | 52 | T3 | N0 | M0 |  | MT | WT | WT |  | GSE39582 |
| GSM972392 | GPL570 | 75 | F | Right | II |  | 1 | 44 | T4 | N0 | M0 |  | WT | MT | WT |  | GSE39582 |
| GSM972393 | GPL570 | 76 | M | Right | II |  | 1 | 47 | T3 | N0 | M0 |  | WT | MT | WT |  | GSE39582 |
| GSM972394 | GPL570 | 81 | M | Left | III |  | 1 | 11 | T3 | N1 | M0 |  | WT | MT | MT |  | GSE39582 |
| GSM972395 | GPL570 | 64 | M | Left | III |  | 0 | 147 | T4 | N1 | M0 |  | WT | WT | MT |  | GSE39582 |
| GSM972396 | GPL570 | 72 | M | Right | II |  | 0 | 107 | T3 | N0 | M0 |  | WT | WT | WT |  | GSE39582 |
| GSM972397 | GPL570 | 83 | F | Left | II |  | 0 | 105 | T3 | N0 | M0 |  | WT | MT | MT |  | GSE39582 |
| GSM972398 | GPL570 | 65 | M | Left | II |  | 1 | 64 | T3 | N0 | M0 |  | WT | WT | MT |  | GSE39582 |
| GSM972399 | GPL570 | 54 | F | Left | III |  | 0 | 90 | T4 | N1 | M0 |  | WT | WT | MT |  | GSE39582 |
| GSM972400 | GPL570 | 67.8 | F | Left | IV |  | 1 | 11 | T4 | N2 | M1 |  | WT | MT | MT |  | GSE39582 |
| GSM972402 | GPL570 | 71 | M | Right | II |  | 1 | 31 | T3 | N0 | M1 |  | WT | MT |  |  | GSE39582 |
| GSM972403 | GPL570 | 70 | F | Right | II |  | 0 | 56 | T3 | N0 | M0 |  | WT | MT |  |  | GSE39582 |
| GSM972404 | GPL570 | 68 | M | Left | II |  | 0 | 48 | T3 | N0 | M0 |  | WT | WT |  |  | GSE39582 |
| GSM972405 | GPL570 | 70 | F | Left | II |  | 1 | 79 | T4 | N0 | M0 |  | WT | WT |  |  | GSE39582 |
| GSM972406 | GPL570 | 66 | F | Left | II |  | 0 | 106 | T3 | N0 | M0 |  | WT | WT |  |  | GSE39582 |
| GSM972407 | GPL570 | 42 | F | Left | II |  | 0 | 132 | T4 | N0 | M0 |  | WT | WT |  |  | GSE39582 |
| GSM972408 | GPL570 | 66 | M | Left | II |  | 1 | 32 | T3 | N0 | M0 |  | WT | WT |  |  | GSE39582 |
| GSM972409 | GPL570 | 72 | F | Left | II |  | 0 | 104 | T4 | N0 | M0 |  | WT | WT |  |  | GSE39582 |
| GSM972410 | GPL570 | 68 | F | Left | II |  | 0 | 91 | T3 | N0 | M0 |  | WT | WT |  |  | GSE39582 |
| GSM972411 | GPL570 | 48 | F | Left | III |  | 0 | 125 | T1 | N1 | M0 |  |  | MT | MT |  | GSE39582 |
| GSM972412 | GPL570 | 78 | M | Right | III |  | 1 | 8 | T3 | N2 | M0 |  |  | WT | MT |  | GSE39582 |
| GSM972413 | GPL570 | 66 | M | Left | III |  | 1 | 20 | T3 | N1 | M0 |  | WT | WT | MT |  | GSE39582 |
| GSM972414 | GPL570 | 52 | F | Left | II |  | 0 | 53 | T3 | N0 | M0 |  | WT | WT | WT |  | GSE39582 |
| GSM972415 | GPL570 | 69 | M | Left | III |  | 1 | 42 | T3 | N1 | M0 |  |  | MT | MT |  | GSE39582 |
| GSM972416 | GPL570 | 49 | M | Left | II |  | 1 | 8 | T4 | N0 | M0 |  | WT | MT | MT |  | GSE39582 |
| GSM972417 | GPL570 | 59 | M | Left | II |  | 0 | 146 | T3 | N0 | M0 |  | WT | WT | WT |  | GSE39582 |
| GSM972418 | GPL570 | 64 | M | Left | II |  | 0 | 70 | T3 | N0 | M0 |  | WT | WT | MT |  | GSE39582 |
| GSM972419 | GPL570 | 85 | F | Left | III |  | 1 | 32 | T3 | N2 | M0 |  | WT | WT | MT |  | GSE39582 |
| GSM972420 | GPL570 | 83 | M | Right | III |  | 1 | 6 | T3 | N2 | M0 |  | MT | WT | WT |  | GSE39582 |
| GSM972421 | GPL570 | 66 | M | Left | III |  | 0 | 28 |  |  |  |  | WT | WT | MT |  | GSE39582 |
| GSM972422 | GPL570 | 74 | M | Right | II |  | 1 | 37 |  |  |  |  | WT | MT | WT |  | GSE39582 |
| GSM972423 | GPL570 | 52 | F | Left | II |  | 0 | 40 |  |  |  |  | WT | WT | MT |  | GSE39582 |
| GSM972424 | GPL570 | 70 | M | Left | II |  | 0 | 104 | T3 | N0 | M0 |  | WT | WT | MT |  | GSE39582 |
| GSM972425 | GPL570 | 72 | F | Right | III |  | 0 | 59 | T3 | N1 | M0 |  | WT | MT | WT |  | GSE39582 |
| GSM972426 | GPL570 | 49 | M | Right | II |  | 0 | 81 | T3 | N0 | M0 |  | WT | WT | MT |  | GSE39582 |
| GSM972427 | GPL570 | 63 | M | Left | II |  | 0 | 53 | T3 | N0 | M0 |  | WT | WT | MT |  | GSE39582 |
| GSM972428 | GPL570 | 62 | M | Left | III |  | 0 | 55 | T3 | N2 | M0 |  | WT | WT | MT |  | GSE39582 |
| GSM972429 | GPL570 | 64 | M | Left | III |  | 0 | 62 | T4 | N2 | M0 |  | WT | MT | MT |  | GSE39582 |
| GSM972430 | GPL570 | 43 | F | Right | II |  | 0 | 53 | T3 | N0 | M0 |  | WT | WT | WT |  | GSE39582 |
| GSM972431 | GPL570 | 59 | M | Right | III |  | 0 | 54 | T3 | N1 | M0 |  | WT | MT | WT |  | GSE39582 |
| GSM972432 | GPL570 | 71 | M | Left | III |  | 0 | 55 |  |  |  |  | WT | MT | MT |  | GSE39582 |
| GSM972433 | GPL570 | 85 | M | Left | III |  | 1 | 16 |  |  |  |  | WT | WT | WT |  | GSE39582 |
| GSM972434 | GPL570 | 70 | M | Left | II |  | 1 | 42 |  |  |  |  | WT | WT | MT |  | GSE39582 |
| GSM972435 | GPL570 | 71 | M | Left | III |  | 0 | 40 |  |  |  |  | WT | WT | MT |  | GSE39582 |
| GSM972436 | GPL570 | 81 | M | Left | II |  | 1 | 18 |  |  |  |  | WT | MT | MT |  | GSE39582 |
| GSM972437 | GPL570 | 48 | F | Left | IV |  | 1 | 7 | T3 | N2 | M1 |  | WT | WT | WT |  | GSE39582 |
| GSM972438 | GPL570 | 44 | M | Right | IV |  | 1 | 30 | T4 | N1 | M1 |  | WT | WT | MT |  | GSE39582 |
| GSM972439 | GPL570 | 65 | M | Left | IV |  | 1 | 2 | T3 | N1 | M1 |  | WT | WT | MT |  | GSE39582 |
| GSM972440 | GPL570 | 50 | M | Left | II |  | 0 | 52 | T3 | N0 | M0 |  | WT | MT | MT |  | GSE39582 |
| GSM972441 | GPL570 | 49 | F | Left | IV |  | 0 | 68 | T4 | N2 | M1 |  | WT | WT | WT |  | GSE39582 |
| GSM972442 | GPL570 | 54 | F | Left | IV |  | 1 | 6 | T3 | N2 | M1 |  | WT | MT | WT |  | GSE39582 |
| GSM972443 | GPL570 | 49 | M | Left | II |  | 0 | 48 | T3 | N0 | M0 |  | WT | WT |  |  | GSE39582 |
| GSM972444 | GPL570 | 73 | M | Right | III |  | 1 | 14 | T4 | N2 |  |  | WT | MT |  |  | GSE39582 |
| GSM972445 | GPL570 | 48 | M | Right | II |  | 0 | 35 | T4 | N0 | M0 |  | WT | WT |  |  | GSE39582 |
| GSM972447 | GPL570 | 71 | M | Right | II |  | 0 | 31 | T3 | N0 | M0 |  | MT | WT |  |  | GSE39582 |
| GSM972449 | GPL570 | 51 | F | Right | III |  | 1 | 41 | T4 | N1 | M0 |  | WT | MT | MT |  | GSE39582 |
| GSM972450 | GPL570 | 80 | M | Left | II |  | 1 | 47 | T3 | N0 | M0 |  | WT | WT | MT |  | GSE39582 |
| GSM972451 | GPL570 | 58 | M | Left | II |  | 0 | 97 | T4 | N0 | M0 |  | WT | WT | WT |  | GSE39582 |
| GSM972452 | GPL570 | 75 | F | Right | III |  | 0 | 99 | T3 | N2 | M0 |  | MT | WT | WT |  | GSE39582 |
| GSM972453 | GPL570 | 51 | F | Right | III |  | 0 | 100 | T3 | N1 | M0 |  | WT | MT | WT |  | GSE39582 |
| GSM972454 | GPL570 | 62 | M | Left | I |  | 0 | 75 | T2 | N0 | M0 |  | WT | MT | MT |  | GSE39582 |
| GSM972455 | GPL570 | 89 | F | Right | III |  | 0 | 74 | T3 | N1 | M0 |  | MT | WT | WT |  | GSE39582 |
| GSM972457 | GPL570 | 74 | F | Left | III |  | 0 | 68 | T3 | N1 | M0 |  | WT | MT | WT |  | GSE39582 |
| GSM972458 | GPL570 | 65 | M | Right | II |  | 1 | 17 | T3 | N0 | M0 |  | WT | MT | WT |  | GSE39582 |
| GSM972459 | GPL570 | 80 | M | Right | II |  | 0 | 12 | T3 | N0 | M0 |  | WT | WT | WT |  | GSE39582 |
| GSM972460 | GPL570 | 70 | F | Left | II |  | 0 | 96 | T3 | N0 | M0 |  | WT | WT | WT |  | GSE39582 |
| GSM972461 | GPL570 | 56 | M | Left | II |  | 0 | 96 | T3 | N0 | M0 |  | WT | WT | MT |  | GSE39582 |
| GSM972462 | GPL570 | 72 | M | Left | I |  | 0 | 88 | T2 | N0 | M0 |  | WT | MT | MT |  | GSE39582 |
| GSM972463 | GPL570 | 67 | M | Right | III |  | 1 | 2 | T4 | N2 | M0 |  | WT | MT | WT |  | GSE39582 |
| GSM972464 | GPL570 | 76 | F | Left | I |  | 0 | 86 | T2 | N0 | M0 |  | WT | WT | MT |  | GSE39582 |
| GSM972465 | GPL570 | 73 | M | Right | II |  | 1 | 84 | T3 | N0 | M0 |  | WT | WT |  |  | GSE39582 |
| GSM972466 | GPL570 | 73 | F | Right | III |  | 0 | 75 | T3 | N1 | M0 |  | WT | MT | MT |  | GSE39582 |
| GSM972467 | GPL570 | 54 | M | Left | III |  | 0 | 72 | T3 | N2 | M0 |  | WT | MT | MT |  | GSE39582 |
| GSM972468 | GPL570 | 73 | M | Left | II |  | 1 | 24 | T3 | N0 | M0 |  | WT | WT | MT |  | GSE39582 |
| GSM972469 | GPL570 | 69 | M | Left | I |  | 0 | 86 | T2 | N0 | M0 |  | WT | MT | WT |  | GSE39582 |
| GSM972470 | GPL570 | 50 | M | Right | II |  | 0 | 85 | T3 | N0 | M0 |  | WT | WT | MT |  | GSE39582 |
| GSM972472 | GPL570 | 58 | M | Right | II |  | 0 | 80 | T4 | N0 | M0 |  | WT | WT | WT |  | GSE39582 |
| GSM972473 | GPL570 | 67 | M | Left | II |  | 0 | 117 | T3 | N0 | M0 |  | WT | MT | WT |  | GSE39582 |
| GSM972474 | GPL570 | 49 | F | Left | III |  | 0 | 119 | T3 | N1 | M0 |  | WT | WT | MT |  | GSE39582 |
| GSM972475 | GPL570 | 68 | F | Left | II |  | 0 | 87 | T3 | N0 | M0 |  | WT | MT | WT |  | GSE39582 |
| GSM972476 | GPL570 | 61 | M | Left | III |  | 0 | 64 | T4 | N1 | M0 |  | WT | WT | WT |  | GSE39582 |
| GSM972477 | GPL570 | 75 | M | Right | II |  | 0 | 81 | T3 | N0 | M0 |  | WT | MT | MT |  | GSE39582 |
| GSM972478 | GPL570 | 80 | M | Left | II |  | 0 | 69 | T3 | N0 | M0 |  | WT | WT | MT |  | GSE39582 |
| GSM972479 | GPL570 | 79 | M | Right | III |  | 0 | 3 | T4 | N2 | M0 |  | WT | MT | WT |  | GSE39582 |
| GSM972480 | GPL570 | 78 | M | Right | II |  | 0 | 69 | T3 | N0 | M0 |  | WT | MT | WT |  | GSE39582 |
| GSM972481 | GPL570 | 67 | M | Left | III |  | 1 | 65 | T3 | N2 | M0 |  | WT | WT | MT |  | GSE39582 |
| GSM972482 | GPL570 | 90 | F | Right | II |  | 0 | 42 | T3 | N0 | M0 |  | WT | MT | WT |  | GSE39582 |
| GSM972483 | GPL570 | 80 | F | Left | II |  | 1 | 28 | T3 | N0 | M0 |  | WT | WT | MT |  | GSE39582 |
| GSM972484 | GPL570 | 68 | M | Left | II |  | 0 | 76 | T3 | N0 | M0 |  | WT | WT | WT |  | GSE39582 |
| GSM972485 | GPL570 | 69 | M | Right | II |  | 0 | 75 | T3 | N0 | M0 |  | WT | MT | WT |  | GSE39582 |
| GSM972486 | GPL570 | 87 | M | Right | II |  | 0 | 33 | T3 | N0 | M0 |  | WT |  | WT |  | GSE39582 |
| GSM972487 | GPL570 | 84 | M | Left | II |  | 0 | 67 | T3 | N0 | M0 |  | WT | MT | WT |  | GSE39582 |
| GSM972488 | GPL570 | 65 | M | Right | II |  | 0 | 49 | T3 | N0 | M0 |  | WT | MT | WT |  | GSE39582 |
| GSM972489 | GPL570 | 77 | F | Right | II |  | 0 | 74 | T3 | N0 | M0 |  | WT | MT | WT |  | GSE39582 |
| GSM972490 | GPL570 | 67 | M | Left | II |  | 0 | 74 | T3 | N0 | M0 |  | WT | WT | MT |  | GSE39582 |
| GSM972491 | GPL570 | 74 | M | Left | II |  | 0 | 70 | T3 | N0 | M0 |  | WT | WT | MT |  | GSE39582 |
| GSM972492 | GPL570 | 69 | M | Right | I |  | 0 | 68 | T2 | N0 | M0 |  | WT | WT | MT |  | GSE39582 |
| GSM972493 | GPL570 | 89 | F | Right | II |  | 0 | 59 | T3 | N0 | M0 |  | WT | MT | WT |  | GSE39582 |
| GSM972494 | GPL570 | 43 | F | Left | I |  | 0 | 57 | T2 | N0 | M0 |  | WT | WT | WT |  | GSE39582 |
| GSM972495 | GPL570 | 69 | F | Right | III |  | 1 | 27 | T3 | N1 | M0 |  | WT | WT | WT |  | GSE39582 |
| GSM972496 | GPL570 | 65 | F | Left | I |  | 0 | 142 | T2 | N0 | M0 |  | WT | WT | WT |  | GSE39582 |
| GSM972497 | GPL570 | 77 | F | Left | III |  | 0 | 1 | T2 | N1 | M0 |  | WT |  | MT |  | GSE39582 |
| GSM972498 | GPL570 | 50 | F | Left | III |  | 1 | 59 | T3 | N1 | M0 |  | WT | WT | MT |  | GSE39582 |
| GSM972499 | GPL570 | 82 | M | Right | III |  | 0 | 72 | T4 | N2 | M0 |  | WT | WT | WT |  | GSE39582 |
| GSM972501 | GPL570 | 76 | F | Left | III |  | 1 | 106 | T3 | N1 | M0 |  | WT | WT | MT |  | GSE39582 |
| GSM972502 | GPL570 | 69 | M | Left | II |  | 0 | 131 | T3 | N0 | M0 |  | WT | WT | WT |  | GSE39582 |
| GSM972503 | GPL570 | 42 | F | Left | II |  | 0 | 146 | T3 | N0 | M0 |  | WT | WT | WT |  | GSE39582 |
| GSM972504 | GPL570 | 80 | M | Left | III |  | 1 | 30 | T3 | N2 | M0 |  | WT | MT | WT |  | GSE39582 |
| GSM972505 | GPL570 | 69 | M | Left | II |  | 0 | 144 | T3 | N0 | M0 |  | WT | WT | WT |  | GSE39582 |
| GSM972506 | GPL570 | 68 | M | Left | II |  | 0 | 141 | T3 | N0 | M0 |  | WT | WT | MT |  | GSE39582 |
| GSM972507 | GPL570 | 83 | F | Right | III |  | 0 | 42 | T3 | N1 | M0 |  | MT | WT | WT |  | GSE39582 |
| GSM972508 | GPL570 | 69 | F | Left | I |  | 0 | 134 | T1 | N0 | M0 |  | WT | MT | MT |  | GSE39582 |
| GSM972509 | GPL570 | 73 | F | Left | I |  | 0 | 14 | T2 | N0 | M0 |  | WT | WT | WT |  | GSE39582 |
| GSM972510 | GPL570 | 89 | M | Left | II |  | 0 | 86 | T3 | N0 | M0 |  | WT | WT | WT |  | GSE39582 |
| GSM972511 | GPL570 | 75 | M | Right | III |  | 1 | 47 | T3 | N2 | M0 |  | WT | WT | MT |  | GSE39582 |
| GSM972512 | GPL570 | 62 | M | Right | III |  | 1 | 23 | T4 | N2 | M0 |  | WT | MT | WT |  | GSE39582 |
| GSM972513 | GPL570 | 85 | M | Right | III |  | 1 | 48 | T3 | N1 | M0 |  | WT | MT | MT |  | GSE39582 |
| GSM972514 | GPL570 | 79 | F | Left | III |  | 1 | 32 | T2 | N1 | M0 |  | WT | WT | MT |  | GSE39582 |
| GSM972515 | GPL570 | 72 | F | Left | II |  | 0 | 118 | T3 | N0 | M0 |  | WT | WT | MT |  | GSE39582 |
| GSM972516 | GPL570 | 82 | M | Left | II |  | 0 | 66 | T3 | N0 | M0 |  | WT | MT | WT |  | GSE39582 |
| GSM972517 | GPL570 | 88 | F | Left | II |  | 1 | 37 | T3 | N0 | M0 |  | WT | WT | MT |  | GSE39582 |
| GSM972518 | GPL570 | 82 | F | Right | III |  | 1 | 35 | T4 | N1 | M0 |  | WT | MT | MT |  | GSE39582 |
| GSM972519 | GPL570 | 58 | M | Left | II |  | 1 | 14 | T3 | N0 | M0 |  | WT | WT | MT |  | GSE39582 |
| GSM972520 | GPL570 | 76 | M | Left | III |  | 1 | 62 | T3 | N1 | M0 |  | WT | WT | MT |  | GSE39582 |
| GSM972521 | GPL570 | 90 | F | Right | II |  | 1 | 76 | T3 | N0 | M0 |  | WT | WT | MT |  | GSE39582 |
| GSM972522 | GPL570 | 53 | F | Right | II |  | 0 | 99 | T3 | N0 | M0 |  | WT | MT | WT |  | GSE39582 |
